# Supplementary material for: Performance of binary prediction models in high-correlation low-dimensional settings: a comparison of methods
Source: PubMed Central journal article supplement (PMC8751246; doi:10.1186/s41512-021-00115-5), 2022-01-11
Supplement: 41512_2021_115_MOESM2_ESM.pdf [file 41512_2021_115_MOESM2_ESM.pdf]

# Additional file 2

## Real study data characteristics and specification of predictors.

**Table 1** General study population characteristics. For age we report the median and standard deviation. For the other variables, we report the number and the percentage of the whole population.

|                                              | UMCG<br>(n=740) |
|----------------------------------------------|-----------------|
| <b>Patient characteristics (at baseline)</b> |                 |
| Age                                          | 63 (10)         |
| Gender                                       |                 |
| Men                                          | 552 (75%)       |
| Women                                        | 188 (25%)       |
| Primary tumor site                           |                 |
| Pharynx                                      | 356 (48%)       |
| Larynx                                       | 344 (46%)       |
| Oral cavity                                  | 40 (5%)         |
| Treatment modality                           |                 |
| Conventional radiotherapy                    | 159 (21%)       |
| Accelerated radiotherapy                     | 287 (39%)       |
| Chemoradiation                               | 252 (34%)       |
| Bioradiation                                 | 42 (6%)         |
| T-classification                             |                 |
| Tis-T1                                       | 136 (18%)       |
| T2                                           | 246 (33%)       |
| T3                                           | 182 (25%)       |
| T4                                           | 176 (24%)       |
| N-classification                             |                 |
| N0                                           | 356 (48%)       |
| N1                                           | 64 (9%)         |
| N2                                           | 303 (41%)       |
| N3                                           | 17 (2%)         |
| <b>Predicted outcomes (at M6)</b>            |                 |
| Xerostomia $\geq$ Grade 2                    | 200 (27%)       |
| Dysphagia $\geq$ Grade 2                     | 102 (14%)       |

**Table 2 Predictors used in each predictor set.  $\mathbb{R}$  refers to continuous predictors, and  $\{0, 1\}$  refers to binary predictors. PCM refers to the pharyngeal constrictor muscle. Organs at risk were delineated following consensus guidelines [1]. Dose is expressed in Gray (Gy).**

| Predictor                          | A*<br>(dim=7) | B* <sub><math>\Delta</math></sub><br>(dim=19) | C*<br>(dim=13) | D* <sub><math>\Delta</math></sub><br>(dim=43) |
|------------------------------------|---------------|-----------------------------------------------|----------------|-----------------------------------------------|
| Age                                | $\mathbb{R}$  | $\mathbb{R}$                                  | $\mathbb{R}$   | $\mathbb{R}$                                  |
| Grade 1 complications at baseline  | $\{0, 1\}$    | $\{0, 1\}$                                    | $\{0, 1\}$     | $\{0, 1\}$                                    |
| Grade 2 complications at baseline  | $\{0, 1\}$    | $\{0, 1\}$                                    | $\{0, 1\}$     | $\{0, 1\}$                                    |
| Submandibular left: mean dose      | $\mathbb{R}$  | $\mathbb{R}$                                  | $\mathbb{R}$   | $\mathbb{R}$                                  |
| Submandibular left: V10, V30, V50  | -             | $\mathbb{R}$                                  | -              | $\mathbb{R}$                                  |
| Submandibular right: mean dose     | $\mathbb{R}$  | $\mathbb{R}$                                  | $\mathbb{R}$   | $\mathbb{R}$                                  |
| Submandibular right: V10, V30, V50 | -             | $\mathbb{R}$                                  | -              | $\mathbb{R}$                                  |
| Parotid left: mean dose            | $\mathbb{R}$  | $\mathbb{R}$                                  | $\mathbb{R}$   | $\mathbb{R}$                                  |
| Parotid left: V10, V30, V50        | -             | $\mathbb{R}$                                  | -              | $\mathbb{R}$                                  |
| Parotid right: mean dose           | $\mathbb{R}$  | $\mathbb{R}$                                  | $\mathbb{R}$   | $\mathbb{R}$                                  |
| Parotid right: V10, V30, V50       | -             | $\mathbb{R}$                                  | -              | $\mathbb{R}$                                  |
| PCM.Superior.Dm                    | -             | -                                             | $\mathbb{R}$   | $\mathbb{R}$                                  |
| PCM.Superior V10, 30, 50           | -             | -                                             | -              | $\mathbb{R}$                                  |
| PCM.Med.Dm                         | -             | -                                             | $\mathbb{R}$   | $\mathbb{R}$                                  |
| PCM.Med V10, 30, 50                | -             | -                                             | -              | $\mathbb{R}$                                  |
| PCM.Inferior.Dm                    | -             | -                                             | $\mathbb{R}$   | $\mathbb{R}$                                  |
| PCM.Inferior V10, 30, 50           | -             | -                                             | -              | $\mathbb{R}$                                  |
| Supraglottic.Dm                    | -             | -                                             | $\mathbb{R}$   | $\mathbb{R}$                                  |
| Supraglottic V10, 30, 50           | -             | -                                             | -              | $\mathbb{R}$                                  |
| OralCavity.Ext.Dm                  | -             | -                                             | $\mathbb{R}$   | $\mathbb{R}$                                  |
| OralCavity.Ext. V10, 30, 50        | -             | -                                             | -              | $\mathbb{R}$                                  |
| GlotticArea.Dm                     | -             | -                                             | $\mathbb{R}$   | $\mathbb{R}$                                  |
| GlotticArea V10, 30, 50            | -             | -                                             | -              | $\mathbb{R}$                                  |

#### References

1. Brouwer CL, Steenbakkens RJ, Bourhis J, Budach W, Grau C, Grégoire V, et al. CT-based delineation of organs at risk in the head and neck region: DAHANCA, EORTC, GORTEC, HKNPCSG, NCIC CTG, NCRI, NRG Oncology and TROG consensus guidelines. *Radiotherapy and Oncology*. 2015;117(1):83–90.
