# Supplementary material for: Performance of binary prediction models in high-correlation low-dimensional settings: a comparison of methods
Source: PubMed Central journal article supplement (PMC8751246; doi:10.1186/s41512-021-00115-5), 2022-01-11
Supplement: 41512_2021_115_MOESM4_ESM.pdf [file 41512_2021_115_MOESM4_ESM.pdf]

# Additional file 4

## Correlation plots per predictor set.

In all correlation plots, negative correlations are indicated in blue, and positive correlations in red.

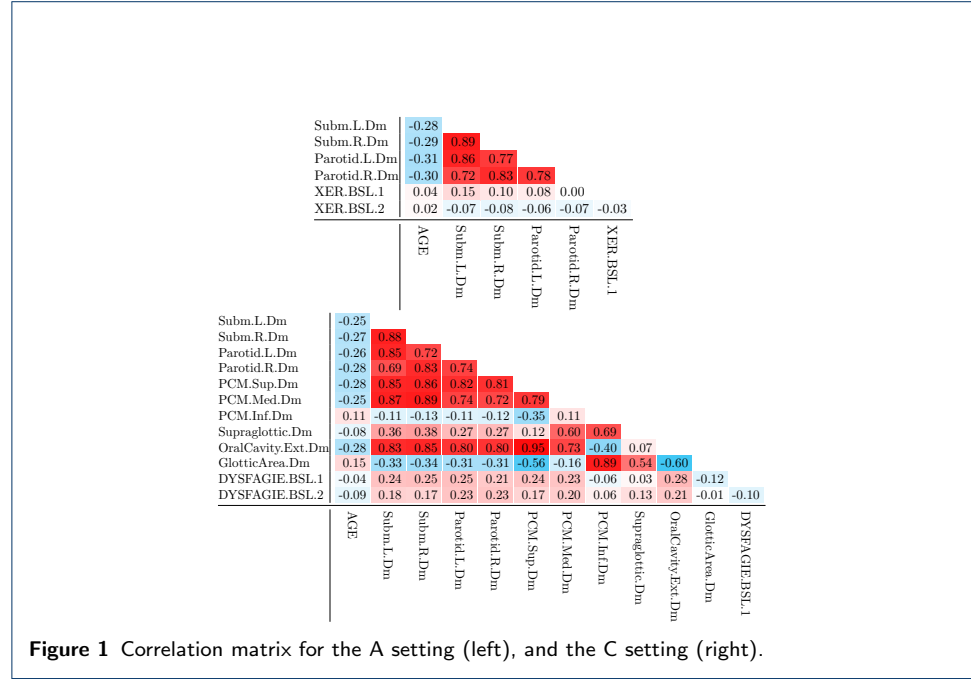

Figure 1 Correlation matrix for the A setting (left), and the C setting (right).

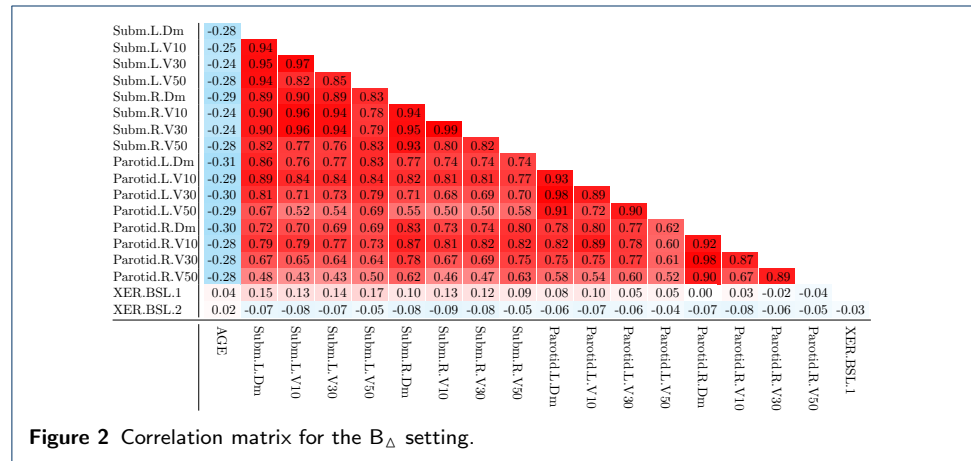

Figure 2 Correlation matrix for the B<sub>Δ</sub> setting.

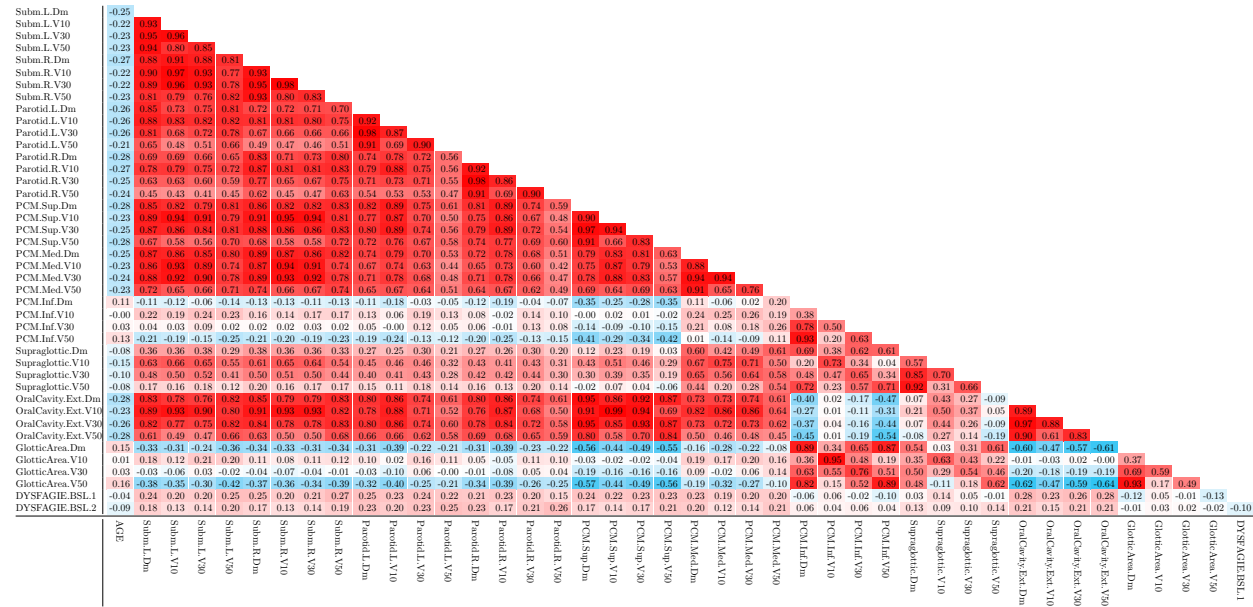

Figure 3 Correlation matrix for the  $D_{\Delta}$  setting.
