# Supplementary material for: Performance of binary prediction models in high-correlation low-dimensional settings: a comparison of methods
Source: PubMed Central journal article supplement (PMC8751246; doi:10.1186/s41512-021-00115-5), 2022-01-11
Supplement: 41512_2021_115_MOESM5_ESM.pdf [file 41512_2021_115_MOESM5_ESM.pdf]

# Additional file 5

## Obtained model coefficients per experimental setting, including the real data settings.

In this section, we report the mean coefficients of the estimated models in all simulated, and real-data settings, together with some general statistics about the coefficients: the sum, and proportion of all negative dose-coefficients ( $\sum_{\beta_{<-0.01}}$  and  $P_{\beta_{<-0.01}}$  respectively), and the sum and proportion of all positive dose-coefficients ( $\sum_{\beta_{>0.01}}$  and  $P_{\beta_{>0.01}}$  respectively).

**Table 1 Mean model coefficients for A.**

|                         | LR                         | Lasso                      | Ridge                      | ElasticNet                 | PCLR                       | LAELR                      | Dropout                    | LRnn                       |
|-------------------------|----------------------------|----------------------------|----------------------------|----------------------------|----------------------------|----------------------------|----------------------------|----------------------------|
| $\sum_{\beta_{<-0.01}}$ | -0.13 (-0.71,0.00)         | -0.01 (0.00,0.00)          | -0.01 (-0.09,0.00)         | 0.00 (0.00,0.00)           | -0.04 (-0.66,0.00)         | -0.03 (-0.42,0.00)         | -0.00 (0.00,0.00)          | 0.00 (0.00,0.00)           |
| $\sum_{\beta_{>0.01}}$  | <b>1.40</b> (1.10,2.04)    | <b>1.24</b> (0.94,1.52)    | <b>1.20</b> (0.93,1.56)    | <b>1.26</b> (0.94,1.50)    | <b>1.38</b> (1.06,2.04)    | <b>1.37</b> (1.06,1.94)    | <b>1.20</b> (0.83,1.55)    | <b>1.36</b> (1.09,1.63)    |
| $P_{\beta_{<-0.01}}$    | 0.16 (0.00,0.50)           | 0.01 (0.00,0.00)           | 0.01 (0.00,0.25)           | 0.00 (0.00,0.00)           | 0.04 (0.00,0.50)           | 0.03 (0.00,0.25)           | 0.00 (0.00,0.00)           | 0.00 (0.00,0.00)           |
| $P_{\beta_{>0.01}}$     | <b>0.83</b> (0.50,1.00)    | <b>0.86</b> (0.50,1.00)    | <b>0.90</b> (0.75,1.00)    | <b>0.96</b> (0.75,1.00)    | <b>0.96</b> (0.50,1.00)    | <b>0.96</b> (0.75,1.00)    | <b>1.00</b> (1.00,1.00)    | <b>0.84</b> (0.50,1.00)    |
| Intercept               | <b>-1.32</b> (-1.58,-1.12) | <b>-1.27</b> (-1.53,-1.07) | <b>-1.26</b> (-1.52,-1.08) | <b>-1.26</b> (-1.50,-1.09) | <b>-1.32</b> (-1.58,-1.12) | <b>-1.32</b> (-1.57,-1.12) | <b>-1.27</b> (-1.52,-1.06) | <b>-1.32</b> (-1.58,-1.12) |
| AGE                     | -0.05 (-0.25,0.15)         | -0.04 (-0.23,0.10)         | -0.05 (-0.22,0.11)         | -0.04 (-0.21,0.10)         | -0.05 (-0.26,0.14)         | -0.05 (-0.26,0.15)         | -0.06 (-0.23,0.12)         | -0.05 (-0.25,0.14)         |
| Subm.L.Dm               | 0.19 (-0.51,0.82)          | 0.21 (-0.00,0.72)          | 0.24 (-0.00,0.39)          | 0.22 (0.00,0.55)           | 0.28 (-0.36,0.63)          | 0.28 (-0.08,0.44)          | 0.26 (0.09,0.40)           | 0.23 (0.00,0.81)           |
| Subm.R.Dm               | 0.38 (-0.35,1.00)          | 0.34 (-0.00,0.86)          | 0.31 (0.05,0.68)           | 0.32 (0.01,0.81)           | 0.38 (-0.00,0.85)          | 0.37 (-0.08,0.85)          | 0.30 (0.10,0.58)           | 0.36 (0.00,0.94)           |
| Parotid.L.Dm            | 0.39 (-0.09,0.95)          | 0.33 (0.00,0.77)           | 0.31 (0.08,0.67)           | 0.32 (0.02,0.70)           | 0.34 (0.01,0.82)           | 0.33 (0.00,0.80)           | 0.31 (0.08,0.56)           | 0.37 (0.00,0.78)           |
| Parotid.R.Dm            | 0.40 (-0.18,0.91)          | 0.35 (-0.00,0.78)          | 0.33 (0.08,0.58)           | 0.34 (0.01,0.63)           | 0.35 (-0.08,0.74)          | 0.36 (0.10,0.74)           | 0.33 (0.06,0.67)           | 0.40 (0.00,0.81)           |
| XER.BSL.2               | 0.25 (0.02,0.47)           | 0.18 (-0.01,0.43)          | 0.19 (0.01,0.39)           | 0.19 (0.01,0.39)           | 0.24 (0.02,0.46)           | 0.24 (0.02,0.45)           | 0.18 (-0.02,0.35)          | 0.25 (0.02,0.47)           |
| XER.BSL.3               | 0.13 (-0.04,0.30)          | 0.08 (-0.01,0.26)          | 0.09 (-0.03,0.26)          | 0.08 (-0.03,0.24)          | 0.12 (-0.04,0.29)          | 0.12 (-0.05,0.30)          | 0.09 (-0.05,0.27)          | 0.13 (-0.04,0.30)          |

**Table 2 Mean model coefficients for A<sub>Δ</sub>.**

|                         | LR                         | Lasso                      | Ridge                      | ElasticNet                 | PCLR                       | LAELR                      | Dropout                    | LRnn                       |
|-------------------------|----------------------------|----------------------------|----------------------------|----------------------------|----------------------------|----------------------------|----------------------------|----------------------------|
| $\sum_{\beta_{<-0.01}}$ | -0.65 (-3.03,0.00)         | 0.00 (0.00,0.00)           | -0.01 (-0.15,0.00)         | 0.00 (0.00,0.00)           | -0.30 (-3.76,0.00)         | -0.34 (-3.66,0.00)         | 0.00 (0.00,0.00)           | 0.00 (0.00,0.00)           |
| $\sum_{\beta_{>0.01}}$  | <b>2.00</b> (1.17,3.74)    | <b>1.27</b> (0.97,1.65)    | <b>1.27</b> (1.00,1.64)    | <b>1.26</b> (1.00,1.63)    | <b>1.74</b> (1.15,5.87)    | <b>1.78</b> (1.15,5.81)    | <b>1.28</b> (0.99,1.68)    | <b>1.43</b> (1.13,1.84)    |
| $P_{\beta_{<-0.01}}$    | 0.28 (0.00,0.50)           | 0.00 (0.00,0.00)           | 0.01 (0.00,0.25)           | 0.00 (0.00,0.00)           | 0.06 (0.00,0.50)           | 0.08 (0.00,0.50)           | 0.00 (0.00,0.00)           | 0.00 (0.00,0.00)           |
| $P_{\beta_{>0.01}}$     | <b>0.71</b> (0.50,1.00)    | <b>0.85</b> (0.50,1.00)    | <b>0.90</b> (0.75,1.00)    | <b>0.97</b> (0.75,1.00)    | <b>0.93</b> (0.50,1.00)    | <b>0.92</b> (0.50,1.00)    | <b>1.00</b> (1.00,1.00)    | <b>0.70</b> (0.50,1.00)    |
| Intercept               | <b>-1.35</b> (-1.56,-1.04) | <b>-1.28</b> (-1.49,-1.02) | <b>-1.28</b> (-1.48,-1.01) | <b>-1.28</b> (-1.48,-1.01) | <b>-1.34</b> (-1.56,-1.04) | <b>-1.34</b> (-1.56,-1.04) | <b>-1.29</b> (-1.53,-1.04) | <b>-1.34</b> (-1.56,-1.04) |
| AGE                     | 0.02 (-0.77,0.85)          | -0.01 (-0.16,0.09)         | -0.01 (-0.20,0.14)         | -0.01 (-0.18,0.14)         | 0.04 (-0.67,1.22)          | 0.04 (-0.73,1.19)          | -0.00 (-0.20,0.17)         | 0.02 (-0.24,0.35)          |
| Subm.L.Dm               | 0.26 (-2.04,2.82)          | 0.15 (-0.00,0.73)          | 0.24 (0.13,0.37)           | 0.20 (0.00,0.38)           | 0.32 (-2.22,3.98)          | 0.31 (-2.09,3.95)          | 0.26 (0.12,0.39)           | 0.25 (0.00,0.97)           |
| Subm.R.Dm               | 0.26 (-1.57,1.86)          | 0.35 (-0.00,1.01)          | 0.31 (0.15,0.59)           | 0.33 (0.00,0.87)           | 0.28 (-3.00,1.89)          | 0.29 (-2.49,1.77)          | 0.32 (0.12,0.52)           | 0.29 (0.00,1.11)           |
| Parotid.L.Dm            | 0.41 (-0.65,1.40)          | 0.38 (0.00,1.00)           | 0.33 (0.09,0.59)           | 0.35 (0.00,0.88)           | 0.37 (-0.83,1.52)          | 0.39 (-0.75,1.49)          | 0.31 (0.11,0.59)           | 0.40 (0.00,1.12)           |
| Parotid.R.Dm            | 0.51 (-0.18,1.28)          | 0.39 (0.01,0.83)           | 0.38 (0.22,0.67)           | 0.38 (0.15,0.69)           | 0.47 (0.10,1.50)           | 0.46 (0.02,1.39)           | 0.37 (0.21,0.78)           | 0.49 (0.07,0.97)           |
| XER.BSL.2               | 0.14 (-0.08,0.44)          | 0.09 (-0.03,0.38)          | 0.12 (-0.06,0.35)          | 0.13 (-0.02,0.38)          | 0.13 (-0.08,0.42)          | 0.13 (-0.09,0.42)          | 0.11 (-0.05,0.35)          | 0.14 (-0.08,0.43)          |
| XER.BSL.3               | 0.06 (-0.12,0.26)          | 0.03 (-0.08,0.18)          | 0.03 (-0.10,0.19)          | 0.03 (-0.09,0.19)          | 0.05 (-0.12,0.26)          | 0.05 (-0.14,0.26)          | 0.04 (-0.12,0.19)          | 0.06 (-0.12,0.27)          |

**Table 3 Mean model coefficients for B.**

|                         | LR                         | Lasso                      | Ridge                      | ElasticNet                 | PCLR                       | LAELR                      | Dropout                    | LRnn                       |
|-------------------------|----------------------------|----------------------------|----------------------------|----------------------------|----------------------------|----------------------------|----------------------------|----------------------------|
| $\sum_{\beta_{<-0.01}}$ | -1.18 (-2.25,-0.34)        | -0.01 (-0.20,0.00)         | -0.04 (-0.22,0.00)         | -0.02 (-0.17,0.00)         | -0.06 (-0.56,0.00)         | -0.07 (-0.46,0.00)         | -0.05 (-0.22,0.00)         | 0.00 (0.00,0.00)           |
| $\sum_{\beta_{>0.01}}$  | <b>2.41</b> (1.98,3.92)    | <b>1.30</b> (1.00,1.82)    | <b>1.44</b> (1.01,1.81)    | <b>1.44</b> (1.04,1.78)    | <b>1.09</b> (1.26,2.51)    | <b>1.63</b> (1.21,2.25)    | <b>1.61</b> (1.16,1.98)    | <b>1.85</b> (1.26,2.02)    |
| $P_{\beta_{<-0.01}}$    | 0.34 (0.19,0.50)           | 0.01 (0.00,0.06)           | 0.05 (0.00,0.19)           | 0.03 (0.00,0.19)           | 0.04 (0.00,0.25)           | 0.05 (0.00,0.25)           | 0.06 (0.00,0.19)           | 0.00 (0.00,0.00)           |
| $P_{\beta_{>0.01}}$     | <b>0.63</b> (0.44,0.81)    | <b>0.65</b> (0.44,0.88)    | <b>0.92</b> (0.75,1.00)    | <b>0.83</b> (0.69,1.00)    | <b>0.94</b> (0.69,1.00)    | <b>0.93</b> (0.62,1.00)    | <b>0.89</b> (0.69,1.00)    | <b>0.56</b> (0.44,0.75)    |
| Intercept               | <b>-1.37</b> (-1.71,-1.10) | <b>-1.27</b> (-1.55,-1.02) | <b>-1.25</b> (-1.53,-1.01) | <b>-1.26</b> (-1.53,-1.03) | <b>-1.33</b> (-1.64,-1.08) | <b>-1.33</b> (-1.64,-1.08) | <b>-1.29</b> (-1.61,-1.04) | <b>-1.35</b> (-1.67,-1.09) |
| AGE                     | -0.03 (-0.31,0.28)         | -0.02 (-0.20,0.17)         | -0.03 (-0.18,0.13)         | -0.03 (-0.17,0.12)         | -0.04 (-0.23,0.20)         | -0.03 (-0.27,0.21)         | -0.03 (-0.19,0.12)         | -0.02 (-0.25,0.27)         |
| Subm.L.Dm               | 0.05 (-1.12,1.05)          | 0.08 (-0.00,0.47)          | 0.08 (-0.02,0.20)          | 0.09 (-0.02,0.24)          | 0.10 (0.01,0.18)           | 0.10 (-0.02,0.24)          | 0.09 (-0.02,0.24)          | 0.06 (0.00,0.53)           |
| Subm.L.V10              | 0.12 (-0.29,0.49)          | 0.07 (-0.01,0.30)          | 0.07 (-0.04,0.21)          | 0.07 (-0.02,0.24)          | 0.07 (-0.11,0.24)          | 0.07 (-0.10,0.25)          | 0.07 (-0.04,0.26)          | 0.10 (0.00,0.40)           |
| Subm.L.V30              | 0.04 (-0.46,0.47)          | 0.05 (-0.01,0.31)          | 0.06 (-0.04,0.20)          | 0.06 (-0.03,0.21)          | 0.07 (-0.09,0.21)          | 0.07 (-0.07,0.20)          | 0.06 (-0.08,0.18)          | 0.06 (0.00,0.35)           |
| Subm.L.V50              | 0.10 (-0.23,0.47)          | 0.07 (-0.01,0.27)          | 0.08 (-0.02,0.17)          | 0.07 (-0.03,0.21)          | 0.09 (-0.09,0.26)          | 0.09 (-0.10,0.23)          | 0.08 (-0.04,0.19)          | 0.09 (0.00,0.33)           |
| Subm.R.Dm               | 0.16 (-0.47,0.81)          | 0.10 (-0.00,0.44)          | 0.10 (0.01,0.25)           | 0.10 (0.00,0.27)           | 0.12 (-0.02,0.27)          | 0.12 (-0.01,0.27)          | 0.12 (0.00,0.32)           | 0.12 (0.00,0.53)           |
| Subm.R.V10              | 0.05 (-0.45,0.51)          | 0.07 (-0.01,0.35)          | 0.07 (-0.04,0.18)          | 0.07 (-0.04,0.21)          | 0.09 (0.01,0.26)           | 0.09 (-0.00,0.21)          | 0.08 (-0.05,0.20)          | 0.08 (0.00,0.41)           |
| Subm.R.V30              | 0.07 (-0.51,0.56)          | 0.08 (-0.01,0.41)          | 0.08 (-0.10,0.18)          | 0.08 (-0.03,0.26)          | 0.09 (0.02,0.17)           | 0.09 (-0.09,0.19)          | 0.08 (-0.05,0.21)          | 0.08 (0.00,0.38)           |
| Subm.R.V50              | 0.12 (-0.29,0.44)          | 0.10 (-0.00,0.33)          | 0.10 (-0.01,0.22)          | 0.10 (-0.00,0.24)          | 0.11 (0.02,0.24)           | 0.12 (-0.03,0.24)          | 0.10 (-0.05,0.25)          | 0.12 (0.00,0.37)           |
| Parotid.L.Dm            | 0.09 (-0.54,0.74)          | 0.07 (-0.00,0.26)          | 0.08 (-0.06,0.16)          | 0.08 (-0.01,0.17)          | 0.08 (-0.02,0.18)          | 0.10 (-0.03,0.20)          | 0.09 (-0.04,0.18)          | 0.09 (0.00,0.34)           |
| Parotid.L.V10           | 0.14 (-0.28,0.57)          | 0.11 (-0.01,0.37)          | 0.10 (-0.04,0.23)          | 0.10 (-0.05,0.27)          | 0.10 (-0.16,0.36)          | 0.10 (-0.09,0.34)          | 0.11 (-0.02,0.25)          | 0.14 (0.00,0.43)           |
| Parotid.L.V30           | 0.17 (-0.43,0.73)          | 0.11 (-0.00,0.37)          | 0.10 (-0.02,0.23)          | 0.10 (-0.00,0.25)          | 0.10 (0.02,0.22)           | 0.10 (-0.00,0.22)          | 0.10 (-0.03,0.27)          | 0.12 (0.00,0.40)           |
| Parotid.L.V50           | 0.06 (-0.55,0.60)          | 0.05 (-0.03,0.29)          | 0.06 (-0.11,0.18)          | 0.05 (-0.08,0.23)          | 0.07 (-0.08,0.21)          | 0.07 (-0.01,0.23)          | 0.10 (-0.09,0.19)          | 0.07 (0.00,0.35)           |
| Parotid.R.Dm            | 0.06 (-0.68,0.95)          | 0.05 (-0.00,0.37)          | 0.06 (0.00,0.21)           | 0.05 (-0.00,0.27)          | 0.07 (0.01,0.22)           | 0.06 (0.02,0.26)           | 0.06 (-0.00,0.23)          | 0.07 (0.00,0.40)           |
| Parotid.R.V10           | 0.15 (-0.27,0.68)          | 0.08 (-0.00,0.52)          | 0.10 (0.04,0.27)           | 0.09 (0.01,0.38)           | 0.12 (0.05,0.37)           | 0.13 (0.02,0.34)           | 0.14 (0.00,0.32)           | 0.19 (0.00,0.54)           |
| Parotid.R.V30           | 0.09 (-0.55,0.81)          | 0.17 (-0.00,0.47)          | 0.13 (-0.00,0.23)          | 0.11 (-0.00,0.35)          | 0.13 (0.05,0.26)           | 0.12 (-0.01,0.26)          | 0.11 (-0.01,0.24)          | 0.12 (0.00,0.51)           |
| Parotid.R.V50           | 0.06 (-0.75,0.71)          | 0.08 (-0.01,0.36)          | 0.08 (-0.04,0.20)          | 0.08 (-0.02,0.30)          | 0.11 (-0.04,0.22)          | 0.10 (-0.06,0.22)          | 0.08 (-0.05,0.21)          | 0.11 (0.00,0.43)           |
| XER.BSL.2               | 0.43 (0.18,0.70)           | 0.31 (0.08,0.56)           | 0.24 (0.09,0.51)           | 0.26 (0.11,0.52)           | 0.38 (0.00,0.67)           | 0.36 (0.00,0.68)           | 0.28 (0.07,0.46)           | 0.42 (0.18,0.69)           |
| XER.BSL.3               | 0.16 (-0.03,0.41)          | 0.09 (-0.01,0.31)          | 0.09 (-0.01,0.24)          | 0.09 (-0.01,0.25)          | 0.15 (-0.06,0.38)          | 0.14 (-0.09,0.37)          | 0.08 (-0.01,0.22)          | 0.16 (-0.03,0.39)          |

Table 4 Mean model coefficients for  $B_{\Delta}$ .

|                       | LR                   | Lasso                | Ridge                | ElasticNet           | PCLR                 | LAELR                | Dropout              | LRnn                 |
|-----------------------|----------------------|----------------------|----------------------|----------------------|----------------------|----------------------|----------------------|----------------------|
| $\sum \beta_{<-0.01}$ | -3.99 (-7.41, -1.42) | -0.10 (-1.37, 0.00)  | -0.09 (-0.93, 0.00)  | -0.03 (-0.50, 0.00)  | -0.14 (-1.33, 0.00)  | -0.30 (-4.09, 0.00)  | -0.06 (-0.58, 0.00)  | 0.00 (0.00, 0.00)    |
| $\sum \beta_{>0.01}$  | 5.52 (2.92, 8.67)    | 1.43 (0.97, 2.89)    | 1.46 (1.04, 2.51)    | 1.38 (1.01, 1.96)    | 1.68 (1.26, 3.17)    | 1.83 (1.23, 5.58)    | 1.50 (1.09, 2.09)    | 1.57 (1.23, 2.00)    |
| $P_{\beta_{<-0.01}}$  | 0.45 (0.31, 0.62)    | 0.02 (0.00, 0.25)    | 0.04 (0.00, 0.38)    | 0.01 (0.00, 0.19)    | 0.06 (0.00, 0.44)    | 0.06 (0.00, 0.50)    | 0.06 (0.00, 0.31)    | 0.00 (0.00, 0.00)    |
| $P_{\beta_{>0.01}}$   | 0.54 (0.38, 0.69)    | 0.60 (0.31, 0.88)    | 0.95 (0.56, 1.00)    | 0.87 (0.31, 1.00)    | 0.93 (0.50, 1.00)    | 0.93 (0.50, 1.00)    | 0.90 (0.69, 1.00)    | 0.39 (0.25, 0.56)    |
| Intercept             | -1.39 (-1.66, -1.09) | -1.29 (-1.52, -1.02) | -1.29 (-1.53, -1.01) | -1.29 (-1.55, -1.01) | -1.35 (-1.61, -1.06) | -1.35 (-1.61, -1.06) | -1.32 (-1.57, -1.04) | -1.37 (-1.63, -1.07) |
| AGE                   | -0.04 (-0.29, 0.15)  | -0.03 (-0.21, 0.06)  | -0.03 (-0.21, 0.07)  | -0.03 (-0.20, 0.08)  | -0.02 (-0.25, 0.16)  | -0.02 (-0.27, 0.10)  | -0.03 (-0.20, 0.11)  | -0.04 (-0.26, 0.17)  |
| Subm.L.Dm             | 0.06 (-1.60, 1.40)   | 0.08 (-0.00, 0.62)   | 0.08 (-0.03, 0.19)   | 0.08 (-0.00, 0.25)   | 0.10 (-0.08, 0.26)   | 0.09 (-0.14, 0.26)   | 0.08 (-0.08, 0.20)   | 0.07 (0.00, 0.51)    |
| Subm.L.V10            | 0.00 (-1.51, 1.65)   | 0.06 (-0.01, 0.46)   | 0.07 (-0.04, 0.14)   | 0.07 (-0.01, 0.34)   | 0.09 (-0.03, 0.17)   | 0.09 (-0.13, 0.18)   | 0.07 (-0.05, 0.18)   | 0.07 (0.00, 0.56)    |
| Subm.L.V30            | -0.00 (-1.09, 1.02)  | 0.04 (-0.01, 0.38)   | 0.05 (-0.24, 0.14)   | 0.06 (-0.01, 0.16)   | 0.07 (-0.12, 0.15)   | 0.06 (-0.76, 0.23)   | 0.07 (-0.09, 0.18)   | 0.05 (0.00, 0.37)    |
| Subm.L.V50            | 0.07 (-0.88, 1.01)   | 0.06 (-0.07, 0.37)   | 0.07 (-0.08, 0.16)   | 0.06 (-0.07, 0.18)   | 0.07 (-0.35, 0.28)   | 0.09 (-0.25, 0.38)   | 0.08 (-0.07, 0.23)   | 0.08 (0.00, 0.41)    |
| Subm.R.Dm             | 0.24 (-1.33, 2.12)   | 0.14 (-0.00, 0.89)   | 0.12 (0.03, 0.43)    | 0.11 (0.01, 0.47)    | 0.12 (0.04, 0.18)    | 0.15 (0.03, 0.90)    | 0.11 (0.02, 0.23)    | 0.10 (0.00, 0.72)    |
| Subm.R.V10            | 0.00 (-1.17, 1.40)   | 0.04 (-0.00, 0.51)   | 0.08 (-0.01, 0.20)   | 0.07 (-0.00, 0.19)   | 0.10 (-0.04, 0.22)   | 0.10 (-0.17, 0.44)   | 0.09 (-0.04, 0.20)   | 0.08 (0.00, 0.58)    |
| Subm.R.V30            | 0.22 (-1.19, 1.60)   | 0.11 (-0.00, 0.64)   | 0.09 (0.02, 0.27)    | 0.09 (0.00, 0.35)    | 0.09 (-0.13, 0.20)   | 0.09 (-0.47, 0.33)   | 0.09 (-0.04, 0.25)   | 0.15 (0.00, 0.73)    |
| Subm.R.V50            | 0.07 (-1.10, 0.99)   | 0.11 (-0.00, 0.53)   | 0.09 (-0.15, 0.19)   | 0.10 (-0.00, 0.29)   | 0.09 (-0.19, 0.27)   | 0.07 (-0.43, 0.17)   | 0.10 (-0.06, 0.24)   | 0.13 (0.00, 0.57)    |
| Parotid.L.Dm          | 0.35 (-1.09, 1.40)   | 0.09 (-0.00, 0.50)   | 0.10 (0.04, 0.34)    | 0.09 (0.00, 0.21)    | 0.11 (0.01, 0.29)    | 0.13 (0.03, 0.56)    | 0.10 (-0.01, 0.20)   | 0.05 (0.00, 0.38)    |
| Parotid.L.V10         | 0.11 (-1.00, 0.91)   | 0.15 (-0.00, 0.79)   | 0.12 (0.02, 0.64)    | 0.13 (0.00, 0.73)    | 0.13 (0.05, 0.57)    | 0.14 (0.05, 0.80)    | 0.12 (-0.02, 0.34)   | 0.16 (0.00, 0.73)    |
| Parotid.L.V30         | 0.08 (-1.20, 1.82)   | 0.11 (-0.00, 0.57)   | 0.09 (0.01, 0.32)    | 0.10 (0.00, 0.53)    | 0.09 (-0.15, 0.30)   | 0.09 (-0.17, 0.47)   | 0.10 (-0.02, 0.34)   | 0.12 (0.00, 0.57)    |
| Parotid.L.V50         | -0.06 (-1.31, 0.93)  | 0.03 (-0.01, 0.31)   | 0.05 (-0.16, 0.14)   | 0.05 (-0.14, 0.16)   | 0.07 (-0.25, 0.25)   | 0.06 (-0.37, 0.21)   | 0.05 (-0.10, 0.18)   | 0.09 (0.00, 0.36)    |
| Parotid.R.Dm          | 0.08 (-3.11, 3.09)   | 0.11 (-0.01, 0.42)   | 0.09 (0.00, 0.14)    | 0.09 (0.00, 0.18)    | 0.11 (0.01, 0.18)    | 0.09 (-0.27, 0.21)   | 0.10 (0.00, 0.19)    | 0.04 (0.00, 0.33)    |
| Parotid.R.V10         | 0.16 (-0.99, 1.40)   | 0.14 (-0.01, 0.49)   | 0.11 (0.02, 0.29)    | 0.12 (0.00, 0.36)    | 0.13 (-0.01, 0.52)   | 0.11 (-0.08, 0.54)   | 0.13 (-0.01, 0.38)   | 0.17 (0.00, 0.57)    |
| Parotid.R.V30         | 0.07 (-1.48, 1.93)   | 0.07 (-0.01, 0.46)   | 0.09 (-0.03, 0.17)   | 0.09 (-0.00, 0.29)   | 0.10 (-0.32, 0.25)   | 0.09 (-0.36, 0.43)   | 0.09 (-0.03, 0.20)   | 0.13 (0.00, 0.51)    |
| Parotid.R.V50         | 0.08 (-1.25, 1.62)   | 0.04 (-0.01, 0.32)   | 0.07 (-0.08, 0.20)   | 0.06 (-0.04, 0.21)   | 0.08 (-0.22, 0.30)   | 0.09 (-0.19, 0.40)   | 0.06 (-0.07, 0.17)   | 0.10 (0.00, 0.39)    |
| XER.BSL.2             | 0.20 (-0.01, 0.40)   | 0.12 (-0.00, 0.35)   | 0.11 (-0.01, 0.34)   | 0.12 (-0.00, 0.29)   | 0.14 (-0.04, 0.37)   | 0.12 (-0.08, 0.37)   | 0.11 (-0.03, 0.30)   | 0.20 (-0.03, 0.37)   |
| XER.BSL.3             | 0.09 (-0.15, 0.33)   | 0.04 (-0.05, 0.22)   | 0.05 (-0.05, 0.21)   | 0.05 (-0.05, 0.24)   | 0.06 (-0.13, 0.29)   | 0.05 (-0.14, 0.27)   | 0.05 (-0.07, 0.21)   | 0.09 (-0.12, 0.32)   |

Table 5 Mean model coefficients for C.

|                       | LR                   | Lasso                | Ridge                | ElasticNet           | PCLR                 | LAELR                | Dropout              | LRnn                 |
|-----------------------|----------------------|----------------------|----------------------|----------------------|----------------------|----------------------|----------------------|----------------------|
| $\sum \beta_{<-0.01}$ | -1.02 (-2.38, -0.21) | -0.05 (-0.50, 0.00)  | -0.08 (-0.55, 0.00)  | -0.06 (-0.54, 0.00)  | -0.18 (-1.69, 0.00)  | -0.15 (-1.65, 0.00)  | -0.06 (-0.25, 0.00)  | 0.00 (0.00, 0.00)    |
| $\sum \beta_{>0.01}$  | 3.48 (2.44, 4.28)    | 2.07 (1.50, 3.11)    | 2.08 (1.58, 3.00)    | 2.06 (1.49, 2.92)    | 2.49 (1.83, 4.17)    | 2.48 (1.81, 4.16)    | 2.01 (1.50, 2.73)    | 2.52 (1.93, 3.62)    |
| $P_{\beta_{<-0.01}}$  | 0.32 (0.20, 0.50)    | 0.02 (0.00, 0.20)    | 0.08 (0.00, 0.30)    | 0.05 (0.00, 0.20)    | 0.08 (0.00, 0.30)    | 0.07 (0.00, 0.30)    | 0.07 (0.00, 0.20)    | 0.00 (0.00, 0.00)    |
| $P_{\beta_{>0.01}}$   | 0.67 (0.50, 0.80)    | 0.66 (0.50, 0.90)    | 0.90 (0.70, 1.00)    | 0.85 (0.50, 1.00)    | 0.91 (0.60, 1.00)    | 0.91 (0.70, 1.00)    | 0.92 (0.80, 1.00)    | 0.64 (0.40, 0.90)    |
| Intercept             | -2.96 (-3.58, -2.49) | -2.69 (-3.16, -2.28) | -2.66 (-3.12, -2.27) | -2.67 (-3.14, -2.28) | -2.89 (-3.48, -2.44) | -2.88 (-3.52, -2.44) | -2.69 (-3.19, -2.33) | -2.93 (-3.56, -2.47) |
| AGE                   | 0.01 (-0.28, 0.25)   | 0.00 (-0.17, 0.18)   | -0.01 (-0.19, 0.17)  | -0.01 (-0.18, 0.18)  | 0.03 (-0.30, 0.27)   | 0.04 (-0.31, 0.27)   | -0.01 (-0.22, 0.17)  | 0.02 (-0.25, 0.26)   |
| Subm.L.Dm             | 0.22 (-0.75, 1.07)   | 0.19 (-0.00, 0.66)   | 0.22 (-0.12, 0.53)   | 0.22 (-0.07, 0.54)   | 0.28 (-0.17, 0.88)   | 0.28 (-0.16, 0.80)   | 0.23 (0.05, 0.44)    | 0.21 (0.00, 0.64)    |
| Subm.R.Dm             | 0.26 (-0.82, 1.37)   | 0.22 (-0.00, 0.89)   | 0.24 (0.03, 0.55)    | 0.24 (-0.00, 0.74)   | 0.28 (-0.10, 0.69)   | 0.27 (-0.50, 0.71)   | 0.25 (0.05, 0.57)    | 0.25 (0.00, 1.01)    |
| Parotid.L.Dm          | 0.12 (-0.54, 0.86)   | 0.14 (-0.03, 0.60)   | 0.18 (-0.07, 0.43)   | 0.17 (-0.05, 0.46)   | 0.21 (-0.33, 0.58)   | 0.21 (-0.30, 0.41)   | 0.19 (-0.10, 0.40)   | 0.15 (0.00, 0.63)    |
| Parotid.R.Dm          | 0.21 (-0.52, 1.05)   | 0.23 (-0.00, 0.73)   | 0.23 (0.00, 0.56)    | 0.22 (-0.00, 0.64)   | 0.27 (-0.16, 0.72)   | 0.28 (-0.13, 0.71)   | 0.22 (-0.05, 0.42)   | 0.22 (0.00, 0.78)    |
| PCM.Sup.Dm            | 0.27 (-0.95, 1.56)   | 0.20 (-0.00, 0.85)   | 0.24 (0.01, 0.42)    | 0.23 (0.00, 0.59)    | 0.25 (-0.02, 0.80)   | 0.24 (-0.15, 0.77)   | 0.24 (0.05, 0.39)    | 0.33 (0.00, 1.10)    |
| PCM.Med.Dm            | 0.22 (-0.83, 1.51)   | 0.29 (-0.00, 1.00)   | 0.23 (-0.00, 0.47)   | 0.25 (-0.00, 0.72)   | 0.26 (-0.71, 0.55)   | 0.29 (-0.38, 0.55)   | 0.23 (0.00, 0.56)    | 0.23 (0.00, 1.04)    |
| PCM.Inf.Dm            | 0.33 (-0.43, 1.19)   | 0.13 (-0.01, 0.50)   | 0.15 (-0.06, 0.40)   | 0.15 (-0.03, 0.42)   | 0.18 (-0.03, 0.58)   | 0.15 (0.01, 0.52)    | 0.13 (-0.04, 0.45)   | 0.21 (0.00, 0.63)    |
| Supraglottic.Dm       | 0.19 (-0.75, 1.02)   | 0.18 (-0.08, 0.65)   | 0.17 (-0.17, 0.47)   | 0.17 (-0.21, 0.55)   | 0.21 (-0.60, 0.65)   | 0.21 (-0.58, 0.61)   | 0.18 (-0.20, 0.44)   | 0.20 (0.00, 0.74)    |
| OralCavity.Ext.Dm     | 0.62 (-0.75, 1.86)   | 0.40 (0.00, 1.27)    | 0.30 (0.00, 1.27)    | 0.32 (0.00, 1.00)    | 0.33 (0.19, 1.05)    | 0.33 (0.19, 1.05)    | 0.27 (0.11, 0.72)    | 0.57 (0.00, 1.55)    |
| GlotticArea.Dm        | 0.02 (-0.79, 1.03)   | 0.03 (-0.37, 0.50)   | 0.02 (-0.19, 0.32)   | 0.03 (-0.20, 0.39)   | 0.03 (-0.37, 0.57)   | 0.03 (-0.19, 0.56)   | 0.02 (-0.24, 0.30)   | 0.15 (0.00, 0.83)    |
| DYSFAGIE.BSL.2        | 0.23 (-0.06, 0.50)   | 0.15 (-0.01, 0.42)   | 0.17 (-0.04, 0.38)   | 0.17 (-0.01, 0.37)   | 0.19 (-0.14, 0.47)   | 0.16 (-0.16, 0.48)   | 0.17 (-0.01, 0.39)   | 0.23 (-0.08, 0.49)   |
| DYSFAGIE.BSL.3        | 0.42 (0.12, 0.81)    | 0.31 (0.01, 0.61)    | 0.30 (0.09, 0.56)    | 0.30 (0.08, 0.55)    | 0.38 (0.10, 0.77)    | 0.36 (0.10, 0.80)    | 0.29 (0.08, 0.61)    | 0.42 (0.13, 0.80)    |

Table 6 Mean model coefficients for  $C_{\Delta}$ .

|                       | LR                   | Lasso                | Ridge                | ElasticNet           | PCLR                 | LAELR                | Dropout              | LRnn                 |
|-----------------------|----------------------|----------------------|----------------------|----------------------|----------------------|----------------------|----------------------|----------------------|
| $\sum \beta_{<-0.01}$ | -3.14 (-7.37, -0.74) | -0.08 (-1.10, 0.00)  | -0.11 (-1.31, 0.00)  | -0.06 (-0.61, 0.00)  | -0.31 (-3.40, 0.00)  | -0.39 (-4.87, 0.00)  | -0.08 (-0.50, 0.00)  | 0.00 (0.00, 0.00)    |
| $\sum \beta_{>0.01}$  | 5.40 (2.87, 10.86)   | 1.26 (1.24, 3.37)    | 1.88 (1.30, 3.21)    | 1.62 (1.33, 2.82)    | 2.26 (1.63, 3.00)    | 2.44 (1.59, 6.79)    | 1.64 (1.23, 2.72)    | 2.23 (1.62, 3.33)    |
| $P_{\beta_{<-0.01}}$  | 0.40 (0.20, 0.60)    | 0.03 (0.00, 0.20)    | 0.08 (0.00, 0.40)    | 0.04 (0.00, 0.20)    | 0.10 (0.00, 0.50)    | 0.10 (0.00, 0.50)    | 0.09 (0.00, 0.30)    | 0.00 (0.00, 0.00)    |
| $P_{\beta_{>0.01}}$   | 0.60 (0.40, 0.80)    | 0.60 (0.30, 0.90)    | 0.90 (0.60, 1.00)    | 0.82 (0.40, 1.00)    | 0.88 (0.50, 1.00)    | 0.88 (0.50, 1.00)    | 0.89 (0.70, 1.00)    | 0.48 (0.30, 0.70)    |
| Intercept             | -2.89 (-3.43, -2.41) | -2.65 (-3.22, -2.22) | -2.62 (-3.10, -2.24) | -2.62 (-3.06, -2.21) | -2.82 (-3.40, -2.37) | -2.82 (-3.39, -2.37) | -2.66 (-3.13, -2.26) | -2.86 (-3.41, -2.40) |
| AGE                   | 0.07 (-0.70, 0.79)   | 0.02 (-0.18, 0.34)   | 0.02 (-0.22, 0.29)   | 0.02 (-0.18, 0.28)   | 0.07 (-0.25, 0.36)   | 0.09 (-0.26, 0.59)   | 0.02 (-0.20, 0.25)   | 0.06 (-0.26, 0.42)   |
| Subm.L.Dm             | 0.22 (-2.42, 3.20)   | 0.10 (-0.00, 0.54)   | 0.15 (-0.15, 0.38)   | 0.14 (-0.01, 0.39)   | 0.16 (-0.39, 0.44)   | 0.24 (-0.34, 1.86)   | 0.14 (-0.17, 0.33)   | 0.17 (0.00, 0.97)    |
| Subm.R.Dm             | 0.16 (-2.67, 2.36)   | 0.12 (-0.00, 0.88)   | 0.19 (-0.17, 0.42)   | 0.19 (0.00, 0.43)    | 0.19 (-0.49, 0.36)   | 0.21 (-0.62, 0.49)   | 0.20 (-0.01, 0.43)   | 0.14 (0.00, 0.98)    |
| Parotid.L.Dm          | 0.00 (-1.63, 1.55)   | 0.18 (-0.01, 0.79)   | 0.18 (-0.03, 0.60)   | 0.17 (-0.00, 0.53)   | 0.19 (-0.43, 0.62)   | 0.17 (-0.90, 0.40)   | 0.18 (-0.04, 0.42)   | 0.15 (0.00, 0.79)    |
| Parotid.R.Dm          | 0.23 (-1.26, 1.62)   | 0.30 (-0.04, 0.97)   | 0.24 (-0.10, 0.52)   | 0.26 (-0.00, 0.73)   | 0.26 (-0.32, 0.78)   | 0.28 (-0.27, 0.95)   | 0.25 (-0.05, 0.61)   | 0.29 (0.00, 1.01)    |
| PCM.Sup.Dm            | 0.47 (-2.25, 3.16)   | 0.21 (-0.00, 0.96)   | 0.25 (0.13, 0.59)    | 0.24 (0.01, 0.69)    | 0.33 (0.11, 1.48)    | 0.29 (0.02, 2.13)    | 0.24 (0.11, 0.43)    | 0.24 (0.00, 1.20)    |
| PCM.Med.Dm            | 0.12 (-2.38, 2.67)   | 0.39 (-0.00, 1.26)   | 0.24 (0.10, 0.51)    | 0.26 (0.00, 0.76)    | 0.31 (0.08, 0.57)    | 0.25 (-0.68, 0.53)   | 0.24 (0.08, 0.47)    | 0.26 (0.00, 1.27)    |
| PCM.Inf.Dm            | 0.33 (-1.20, 2.03)   | 0.08 (-0.01, 0.80)   | 0.09 (-0.06, 0.28)   | 0.07 (-0.13, 0.36)   | 0.11 (-0.48, 0.44)   | 0.09 (-0.52, 0.29)   | 0.09 (-0.09, 0.31)   | 0.18 (0.00, 0.75)    |
| Supraglottic.Dm       | 0.23 (-1.02, 1.96)   | 0.20 (-0.00, 0.81)   | 0.22 (0.04, 0.74)    | 0.22 (0.00, 0.80)    | 0.29 (-0.06, 1.11)   | 0.32 (0.11, 1.58)    | 0.23 (0.03, 0.67)    | 0.20 (0.00, 0.76)    |
| OralCavity.Ext.Dm     | 0.55 (-2.06, 3.07)   | 0.25 (-0.00, 1.30)   | 0.23 (0.10, 0.75)    | 0.22 (0.00, 0.60)    | 0.26 (-0.10, 0.99)   | 0.25 (-0.34, 1.04)   | 0.22 (0.03, 0.44)    | 0.57 (0.00, 1.86)    |
| GlotticArea.Dm        | -0.06 (-1.19, 1.08)  | -0.02 (-0.58, 0.33)  | -0.02 (-0.30, 0.16)  | -0.02 (-0.33, 0.15)  | -0.04 (-0.71, 0.25)  | -0.04 (-0.77, 0.16)  | -0.03 (-0.30, 0.14)  | 0.11 (0.00, 0.49)    |
| DYSFAGIE.BSL.2        | 0.15 (-0.16, 0.49)   | 0.11 (-0.01, 0.41)   | 0.14 (-0.02, 0.33)   | 0.13 (-0.01, 0.39)   | 0.13 (-0.11, 0.46)   | 0.13 (-0.08, 0.44)   | 0.15 (-0.09, 0.40)   | 0.15 (-0.14, 0.50)   |
| DYSFAGIE.BSL.3        | 0.27 (-0.12, 0.62)   | 0.20 (-0.02, 0.46)   | 0.21 (-0.02, 0.41)   | 0.21 (-0.01, 0.45)   | 0.26 (-0.05, 0.54)   | 0.26 (-0.04, 0.55)   | 0.21 (-0.02, 0.43)   | 0.26 (-0.12, 0.55)   |

Table 7 Mean model coefficients for D.

|                                 | LR                           | Lasso                       | Ridge                       | ElasticNet                  | PCLR                        | LAELR                       | Dropout                     | LRnn                        |
|---------------------------------|------------------------------|-----------------------------|-----------------------------|-----------------------------|-----------------------------|-----------------------------|-----------------------------|-----------------------------|
| $\sum_{\beta_{\lambda} < 0.01}$ | <b>-7.10</b> (-10.95, -4.18) | <b>-0.05</b> (-0.29, 0.00)  | <b>-0.32</b> (-1.22, -0.01) | <b>-0.19</b> (-1.10, 0.00)  | <b>-0.41</b> (-1.25, 0.00)  | <b>-0.40</b> (-1.57, 0.00)  | <b>-0.48</b> (-0.98, -0.17) | <b>0.00</b> (0.00, 0.00)    |
| $\sum_{\beta_{\lambda} > 0.01}$ | <b>9.80</b> (6.87, 13.90)    | <b>1.91</b> (1.23, 2.92)    | <b>2.38</b> (1.64, 3.61)    | <b>2.17</b> (1.40, 3.25)    | <b>2.77</b> (1.86, 4.09)    | <b>2.76</b> (1.75, 4.25)    | <b>-2.63</b> (-1.98, 3.58)  | <b>2.86</b> (2.05, 3.63)    |
| $P_{\beta_{\lambda} < 0.01}$    | <b>0.44</b> (0.35, 0.55)     | <b>0.03</b> (0.00, 0.10)    | <b>0.15</b> (0.03, 0.30)    | <b>0.08</b> (0.00, 0.25)    | <b>0.16</b> (0.00, 0.35)    | <b>0.16</b> (0.00, 0.40)    | <b>0.21</b> (0.10, 0.33)    | <b>0.00</b> (0.00, 0.00)    |
| $P_{\beta_{\lambda} > 0.01}$    | <b>0.54</b> (0.42, 0.62)     | <b>0.46</b> (0.33, 0.62)    | <b>0.76</b> (0.62, 0.90)    | <b>0.64</b> (0.33, 0.88)    | <b>0.76</b> (0.55, 0.97)    | <b>0.77</b> (0.55, 0.97)    | <b>0.72</b> (0.57, 0.85)    | <b>0.34</b> (0.20, 0.45)    |
| Intercept                       | <b>-3.08</b> (-3.81, -2.62)  | <b>-2.42</b> (-2.82, -2.09) | <b>-2.48</b> (-2.92, -2.09) | <b>-2.43</b> (-2.84, -2.10) | <b>-2.67</b> (-3.20, -2.31) | <b>-2.66</b> (-3.20, -2.20) | <b>-2.58</b> (-3.02, -2.25) | <b>-2.79</b> (-3.33, -2.42) |
| AGE                             | 0.02 (-0.48, 0.43)           | <b>-0.00</b> (-0.13, 0.12)  | <b>0.00</b> (-0.11, 0.13)   | <b>-0.00</b> (-0.13, 0.13)  | <b>0.01</b> (-0.26, 0.32)   | <b>0.01</b> (-0.21, 0.34)   | <b>0.01</b> (-0.16, 0.18)   | <b>0.06</b> (-0.27, 0.35)   |
| Subm.L.Dm                       | <b>0.14</b> (-1.82, 1.98)    | <b>0.06</b> (-0.00, 0.38)   | <b>0.07</b> (-0.03, 0.17)   | <b>0.07</b> (-0.00, 0.26)   | <b>0.07</b> (-0.05, 0.19)   | <b>0.06</b> (-0.07, 0.16)   | <b>0.08</b> (-0.04, 0.21)   | <b>0.04</b> (0.00, 0.31)    |
| Subm.L.V10                      | 0.03 (-1.37, 1.09)           | 0.02 (-0.01, 0.23)          | 0.01 (-0.11, 0.17)          | 0.02 (-0.08, 0.18)          | -0.00 (-0.11, 0.08)         | -0.00 (-0.11, 0.08)         | 0.02 (-0.17, 0.16)          | 0.05 (0.00, 0.43)           |
| Subm.L.V30                      | 0.02 (-1.01, 1.41)           | 0.02 (-0.01, 0.15)          | 0.02 (-0.08, 0.15)          | 0.03 (-0.08, 0.15)          | 0.01 (-0.15, 0.14)          | 0.01 (-0.16, 0.13)          | 0.03 (-0.12, 0.17)          | 0.02 (0.00, 0.24)           |
| Subm.L.V50                      | 0.03 (-0.68, 0.75)           | 0.06 (-0.01, 0.35)          | 0.07 (-0.06, 0.24)          | 0.07 (-0.03, 0.35)          | 0.09 (-0.06, 0.24)          | 0.08 (-0.09, 0.25)          | 0.07 (-0.07, 0.23)          | 0.09 (0.00, 0.47)           |
| Subm.R.Dm                       | 0.09 (-1.56, 1.43)           | 0.07 (-0.01, 0.31)          | 0.06 (-0.06, 0.20)          | 0.06 (-0.04, 0.22)          | 0.08 (-0.06, 0.19)          | 0.07 (-0.11, 0.19)          | 0.07 (-0.06, 0.21)          | 0.06 (0.00, 0.33)           |
| Subm.R.V10                      | -0.00 (-1.15, 0.98)          | 0.01 (-0.01, 0.14)          | 0.02 (-0.12, 0.10)          | 0.02 (-0.11, 0.11)          | 0.01 (-0.07, 0.08)          | 0.01 (-0.07, 0.09)          | 0.02 (-0.12, 0.13)          | 0.03 (0.00, 0.33)           |
| Subm.R.V30                      | -0.04 (-1.18, 0.96)          | 0.02 (-0.01, 0.15)          | 0.02 (-0.09, 0.11)          | 0.02 (-0.08, 0.11)          | 0.02 (-0.08, 0.09)          | 0.02 (-0.10, 0.09)          | 0.02 (-0.14, 0.14)          | 0.03 (0.00, 0.23)           |
| Subm.R.V50                      | 0.06 (-0.69, 0.64)           | 0.04 (-0.01, 0.33)          | 0.06 (-0.10, 0.17)          | 0.05 (-0.10, 0.20)          | 0.08 (-0.11, 0.23)          | 0.08 (-0.11, 0.22)          | 0.07 (-0.09, 0.19)          | 0.05 (0.00, 0.35)           |
| Parotid.L.Dm                    | -0.05 (-1.52, 1.57)          | 0.02 (-0.01, 0.24)          | 0.03 (-0.06, 0.11)          | 0.03 (-0.07, 0.15)          | 0.03 (-0.12, 0.14)          | 0.04 (-0.13, 0.14)          | 0.04 (-0.13, 0.15)          | 0.03 (0.00, 0.23)           |
| Parotid.L.V10                   | 0.06 (-0.66, 0.70)           | 0.03 (-0.00, 0.22)          | 0.05 (-0.06, 0.16)          | 0.05 (-0.01, 0.19)          | 0.06 (-0.09, 0.17)          | 0.06 (-0.05, 0.17)          | 0.06 (-0.11, 0.19)          | 0.05 (0.00, 0.35)           |
| Parotid.L.V30                   | 0.09 (-1.08, 1.33)           | 0.05 (-0.01, 0.21)          | 0.05 (-0.06, 0.17)          | 0.05 (-0.03, 0.19)          | 0.05 (-0.08, 0.14)          | 0.05 (-0.08, 0.14)          | 0.04 (-0.10, 0.20)          | 0.04 (0.00, 0.36)           |
| Parotid.L.V50                   | 0.07 (-1.08, 1.12)           | 0.05 (-0.01, 0.29)          | 0.05 (-0.06, 0.20)          | 0.05 (-0.04, 0.24)          | 0.06 (-0.11, 0.23)          | 0.06 (-0.16, 0.28)          | 0.07 (-0.09, 0.21)          | 0.07 (0.00, 0.37)           |
| Parotid.R.Dm                    | 0.12 (-1.67, 1.89)           | 0.05 (-0.01, 0.26)          | 0.06 (-0.05, 0.16)          | 0.05 (-0.01, 0.16)          | 0.06 (-0.10, 0.20)          | 0.07 (-0.14, 0.19)          | 0.07 (-0.07, 0.18)          | 0.07 (0.00, 0.32)           |
| Parotid.R.V10                   | 0.03 (-0.93, 0.76)           | 0.04 (-0.01, 0.24)          | 0.04 (-0.10, 0.16)          | 0.04 (-0.06, 0.16)          | 0.04 (-0.09, 0.13)          | 0.05 (-0.05, 0.13)          | 0.05 (-0.09, 0.19)          | 0.05 (0.00, 0.34)           |
| Parotid.R.V30                   | 0.03 (-1.62, 1.34)           | 0.05 (-0.01, 0.30)          | 0.05 (-0.04, 0.16)          | 0.06 (-0.01, 0.21)          | 0.06 (-0.03, 0.15)          | 0.07 (-0.04, 0.17)          | 0.06 (-0.07, 0.19)          | 0.03 (0.00, 0.24)           |
| Parotid.R.V50                   | 0.02 (-1.15, 1.47)           | 0.05 (-0.01, 0.39)          | 0.07 (-0.03, 0.29)          | 0.07 (-0.01, 0.25)          | 0.07 (-0.10, 0.23)          | 0.08 (-0.11, 0.22)          | 0.06 (-0.07, 0.18)          | 0.08 (0.00, 0.49)           |
| PCM.Sup.Dm                      | 0.04 (-1.18, 1.54)           | 0.04 (-0.01, 0.26)          | 0.07 (-0.06, 0.18)          | 0.06 (-0.01, 0.19)          | 0.09 (-0.01, 0.24)          | 0.09 (-0.01, 0.21)          | 0.06 (-0.06, 0.19)          | 0.11 (0.00, 0.56)           |
| PCM.Sup.V10                     | -0.01 (-1.12, 1.21)          | 0.03 (-0.01, 0.32)          | 0.03 (-0.06, 0.12)          | 0.03 (-0.04, 0.21)          | 0.04 (-0.06, 0.13)          | 0.03 (-0.09, 0.09)          | 0.03 (-0.10, 0.14)          | 0.07 (0.00, 0.60)           |
| PCM.Sup.V30                     | 0.11 (-0.72, 1.08)           | 0.05 (-0.00, 0.32)          | 0.06 (-0.04, 0.16)          | 0.06 (-0.01, 0.24)          | 0.07 (-0.00, 0.17)          | 0.07 (0.00, 0.16)           | 0.05 (-0.06, 0.17)          | 0.05 (0.00, 0.32)           |
| PCM.Sup.V50                     | 0.06 (-0.86, 1.09)           | 0.08 (-0.00, 0.51)          | 0.09 (-0.01, 0.24)          | 0.09 (-0.01, 0.28)          | 0.12 (0.02, 0.27)           | 0.12 (0.02, 0.26)           | 0.09 (-0.04, 0.25)          | 0.14 (0.00, 0.71)           |
| PCM.Med.Dm                      | 0.22 (-0.66, 1.07)           | 0.13 (-0.01, 0.46)          | 0.09 (-0.03, 0.24)          | 0.10 (-0.01, 0.38)          | 0.10 (-0.06, 0.23)          | 0.11 (-0.06, 0.30)          | 0.11 (-0.03, 0.25)          | 0.11 (0.00, 0.49)           |
| PCM.Med.V10                     | 0.02 (-0.76, 0.85)           | 0.03 (-0.02, 0.24)          | 0.04 (-0.09, 0.20)          | 0.04 (-0.10, 0.23)          | 0.02 (-0.09, 0.17)          | 0.03 (-0.08, 0.21)          | 0.05 (-0.11, 0.21)          | 0.06 (0.00, 0.41)           |
| PCM.Med.V30                     | 0.12 (-0.69, 0.97)           | 0.05 (-0.01, 0.25)          | 0.05 (-0.06, 0.14)          | 0.05 (-0.05, 0.17)          | 0.02 (-0.10, 0.10)          | 0.03 (-0.11, 0.10)          | 0.06 (-0.07, 0.19)          | 0.06 (0.00, 0.39)           |
| PCM.Med.V50                     | 0.02 (-0.66, 0.74)           | 0.06 (-0.00, 0.35)          | 0.06 (-0.07, 0.22)          | 0.06 (-0.02, 0.25)          | 0.10 (-0.10, 0.26)          | 0.10 (-0.12, 0.27)          | 0.06 (-0.10, 0.20)          | 0.06 (0.00, 0.38)           |
| PCM.Inf.Dm                      | 0.30 (-0.35, 0.95)           | 0.08 (-0.01, 0.35)          | 0.10 (-0.03, 0.25)          | 0.09 (-0.02, 0.26)          | 0.10 (-0.01, 0.30)          | 0.11 (-0.03, 0.31)          | 0.10 (-0.09, 0.26)          | 0.14 (0.00, 0.48)           |
| PCM.Inf.V10                     | 0.10 (-0.66, 1.00)           | 0.01 (-0.14, 0.17)          | 0.02 (-0.14, 0.16)          | 0.02 (-0.14, 0.13)          | 0.02 (-0.13, 0.16)          | 0.01 (-0.12, 0.15)          | 0.02 (-0.15, 0.20)          | 0.04 (0.00, 0.26)           |
| PCM.Inf.V30                     | 0.10 (-0.56, 0.48)           | 0.00 (-0.11, 0.14)          | -0.01 (-0.17, 0.11)         | -0.00 (-0.16, 0.12)         | 0.00 (-0.19, 0.18)          | 0.01 (-0.27, 0.18)          | -0.02 (-0.16, 0.16)         | 0.02 (0.00, 0.17)           |
| PCM.Inf.V50                     | -0.09 (-0.62, 0.96)          | 0.05 (-0.01, 0.47)          | 0.06 (-0.06, 0.23)          | 0.06 (-0.02, 0.38)          | 0.10 (-0.01, 0.29)          | 0.10 (-0.03, 0.32)          | 0.06 (-0.07, 0.25)          | 0.12 (0.00, 0.68)           |
| Supraglottic.Dm                 | 0.12 (-0.57, 0.83)           | 0.07 (-0.01, 0.31)          | 0.07 (-0.08, 0.21)          | 0.07 (-0.03, 0.27)          | 0.10 (-0.06, 0.32)          | 0.09 (-0.06, 0.31)          | 0.08 (-0.06, 0.24)          | 0.10 (0.00, 0.41)           |
| Supraglottic.V10                | 0.02 (-0.74, 0.77)           | 0.03 (-0.01, 0.24)          | 0.03 (-0.12, 0.16)          | 0.03 (-0.03, 0.18)          | 0.04 (-0.11, 0.24)          | 0.04 (-0.11, 0.26)          | 0.02 (-0.16, 0.15)          | 0.04 (0.00, 0.34)           |
| Supraglottic.V30                | -0.02 (-0.75, 0.65)          | 0.02 (-0.02, 0.28)          | 0.03 (-0.15, 0.16)          | 0.03 (-0.14, 0.26)          | 0.03 (-0.12, 0.17)          | 0.03 (-0.13, 0.18)          | 0.03 (-0.16, 0.27)          | 0.02 (0.00, 0.23)           |
| Supraglottic.V50                | -0.12 (-0.52, 0.68)          | 0.02 (-0.01, 0.33)          | 0.03 (-0.02, 0.24)          | 0.03 (-0.01, 0.28)          | 0.03 (0.00, 0.26)           | 0.03 (0.00, 0.26)           | 0.03 (-0.03, 0.26)          | 0.02 (0.00, 0.40)           |
| OralCavity.Ext.Dm               | 0.23 (-1.26, 2.17)           | 0.17 (-0.00, 0.65)          | 0.13 (0.03, 0.20)           | 0.13 (0.00, 0.44)           | 0.15 (0.04, 0.35)           | 0.14 (0.04, 0.34)           | 0.13 (-0.00, 0.28)          | 0.15 (0.00, 0.71)           |
| OralCavity.Ext.V10              | 0.04 (-1.29, 1.28)           | 0.01 (-0.01, 0.19)          | 0.04 (-0.05, 0.14)          | 0.03 (-0.03, 0.14)          | 0.05 (-0.03, 0.12)          | 0.05 (-0.04, 0.11)          | 0.04 (-0.06, 0.15)          | 0.03 (0.00, 0.28)           |
| OralCavity.Ext.V30              | 0.15 (-1.11, 1.27)           | 0.08 (-0.00, 0.45)          | 0.08 (-0.02, 0.21)          | 0.08 (-0.02, 0.26)          | 0.10 (0.02, 0.23)           | 0.10 (0.02, 0.24)           | 0.08 (-0.06, 0.22)          | 0.14 (0.00, 0.62)           |
| OralCavity.Ext.V50              | 0.34 (-1.54, 2.33)           | 0.14 (-0.00, 0.57)          | 0.13 (-0.01, 0.29)          | 0.14 (-0.00, 0.49)          | 0.15 (0.01, 0.31)           | 0.15 (0.01, 0.39)           | 0.14 (-0.01, 0.31)          | 0.31 (0.00, 0.82)           |
| GlotticArea.Dm                  | 0.12 (-0.66, 0.84)           | 0.02 (-0.01, 0.18)          | 0.03 (-0.07, 0.18)          | 0.03 (-0.05, 0.19)          | 0.02 (-0.09, 0.18)          | 0.02 (-0.12, 0.15)          | 0.03 (-0.15, 0.18)          | 0.11 (0.00, 0.50)           |
| GlotticArea.V10                 | 0.01 (-0.81, 0.64)           | 0.01 (-0.04, 0.15)          | 0.02 (-0.11, 0.17)          | 0.02 (-0.09, 0.21)          | 0.02 (-0.11, 0.18)          | 0.02 (-0.10, 0.18)          | 0.02 (-0.12, 0.15)          | 0.03 (0.00, 0.26)           |
| GlotticArea.V30                 | -0.12 (-0.64, 0.41)          | -0.00 (-0.17, 0.13)         | -0.02 (-0.17, 0.14)         | -0.02 (-0.18, 0.15)         | -0.04 (-0.33, 0.12)         | -0.04 (-0.33, 0.15)         | -0.02 (-0.17, 0.15)         | 0.02 (0.00, 0.22)           |
| GlotticArea.V50                 | 0.03 (-0.81, 0.81)           | 0.02 (-0.02, 0.17)          | 0.03 (-0.09, 0.15)          | 0.02 (-0.06, 0.18)          | 0.05 (-0.08, 0.18)          | 0.04 (-0.07, 0.20)          | 0.03 (-0.11, 0.18)          | 0.11 (0.00, 0.52)           |
| DYSFAGIE_BSL2                   | 0.33 (-0.09, 0.63)           | 0.15 (-0.01, 0.45)          | 0.14 (-0.01, 0.34)          | 0.12 (-0.00, 0.42)          | 0.24 (-0.04, 0.63)          | 0.24 (-0.09, 0.65)          | 0.14 (-0.01, 0.34)          | 0.29 (-0.08, 0.66)          |
| DYSFAGIE_BSL3                   | 0.59 (0.25, 0.97)            | 0.34 (0.03, 0.64)           | 0.26 (0.09, 0.49)           | 0.30 (0.05, 0.61)           | 0.43 (0.00, 0.87)           | 0.38 (-0.00, 0.89)          | 0.28 (0.09, 0.51)           | 0.54 (0.24, 0.90)           |

Table 8 Mean model coefficients for D<sub>Δ</sub>.

|                                 | LR                            | Lasso                       | Ridge                       | ElasticNet                  | PCLR                        | LAELR                       | Dropout                     | LRnn                        |
|---------------------------------|-------------------------------|-----------------------------|-----------------------------|-----------------------------|-----------------------------|-----------------------------|-----------------------------|-----------------------------|
| $\sum_{\beta_{\lambda} < 0.01}$ | <b>-12.37</b> (-17.94, -7.79) | <b>-0.05</b> (-0.62, 0.00)  | <b>-0.15</b> (-0.90, 0.00)  | <b>-0.12</b> (-0.75, 0.00)  | <b>-0.26</b> (-1.67, 0.00)  | <b>-0.27</b> (-1.70, 0.00)  | <b>-0.38</b> (-1.11, -0.09) | <b>0.00</b> (0.00, 0.00)    |
| $\sum_{\beta_{\lambda} > 0.01}$ | <b>14.95</b> (10.05, 19.91)   | <b>-1.75</b> (1.16, 2.67)   | <b>2.04</b> (1.38, 3.15)    | <b>1.97</b> (1.33, 3.10)    | <b>2.46</b> (1.75, 4.65)    | <b>2.50</b> (1.70, 4.57)    | <b>-2.43</b> (-1.86, 3.48)  | <b>2.57</b> (1.85, 3.63)    |
| $P_{\beta_{\lambda} < 0.01}$    | <b>0.46</b> (0.38, 0.55)      | <b>0.02</b> (0.00, 0.10)    | <b>0.08</b> (0.00, 0.25)    | <b>0.06</b> (0.00, 0.23)    | <b>0.10</b> (0.00, 0.30)    | <b>0.10</b> (0.00, 0.38)    | <b>0.18</b> (0.05, 0.33)    | <b>0.00</b> (0.00, 0.00)    |
| $P_{\beta_{\lambda} > 0.01}$    | <b>0.53</b> (0.45, 0.60)      | <b>0.46</b> (0.28, 0.68)    | <b>0.84</b> (0.68, 0.97)    | <b>0.71</b> (0.28, 0.95)    | <b>0.82</b> (0.57, 1.00)    | <b>0.83</b> (0.57, 1.00)    | <b>0.74</b> (0.60, 0.88)    | <b>0.27</b> (0.15, 0.38)    |
| Intercept                       | <b>-3.02</b> (-3.63, -2.57)   | <b>-2.44</b> (-2.89, -2.09) | <b>-2.46</b> (-2.86, -2.12) | <b>-2.47</b> (-2.84, -2.14) | <b>-2.66</b> (-3.16, -2.29) | <b>-2.66</b> (-3.13, -2.26) | <b>-2.61</b> (-3.01, -2.27) | <b>-2.77</b> (-3.33, -2.40) |
| AGE                             | 0.01 (-0.32, 0.37)            | -0.01 (-0.16, 0.11)         | -0.02 (-0.15, 0.13)         | -0.02 (-0.15, 0.12)         | -0.02 (-0.29, 0.27)         | -0.01 (-0.21, 0.24)         | -0.02 (-0.22, 0.15)         | 0.01 (-0.31, 0.35)          |
| Subm.L.Dm                       | 0.00 (-2.43, 1.84)            | 0.04 (-0.00, 0.36)          | 0.05 (0.01, 0.12)           | 0.05 (-0.00, 0.14)          | 0.05 (-0.02, 0.12)          | 0.05 (-0.01, 0.11)          | 0.06 (-0.04, 0.17)          | 0.03 (0.00, 0.32)           |
| Subm.L.V10                      | 0.00 (-1.79, 2.57)            | 0.02 (-0.01, 0.16)          | 0.03 (-0.02, 0.08)          | 0.03 (-0.02, 0.09)          | 0.02 (-0.05, 0.07)          | 0.02 (-0.06, 0.08)          | 0.03 (-0.10, 0.15)          | 0.04 (0.00, 0.45)           |
| Subm.L.V30                      | -0.05 (-2.33, 1.97)           | 0.02 (-0.00, 0.11)          | 0.03 (-0.04, 0.09)          | 0.02 (-0.03, 0.09)          | 0.02 (-0.16, 0.08)          | 0.02 (-0.16, 0.10)          | 0.02 (-0.09, 0.14)          | 0.03 (0.00, 0.41)           |
| Subm.L.V50                      | 0.08 (-1.33, 1.25)            | 0.06 (-0.00, 0.41)          | 0.06 (-0.03, 0.14)          | 0.07 (-0.02, 0.25)          | 0.07 (-0.01, 0.19)          | 0.06 (-0.14, 0.18)          | 0.07 (-0.09, 0.19)          | 0.07 (0.00, 0.49)           |
| Subm.R.Dm                       | 0.10 (-2.14, 1.77)            | 0.06 (-0.00, 0.60)          | 0.06 (-0.02, 0.14)          | 0.05 (-0.00, 0.17)          | 0.07 (0.02, 0.29)           | 0.07 (0.02, 0.25)           | 0.06 (-0.03, 0.18)          | 0.05 (0.00, 0.62)           |
| Subm.R.V10                      | 0.01 (-2.02, 1.96)            | 0.01 (-0.00, 0.03)          | 0.03 (-0.05, 0.10)          | 0.02 (-0.04, 0.10)          | 0.02 (-0.04, 0.17)          | 0.02 (-0.04, 0.09)          | 0.03 (-0.11, 0.14)          | 0.01 (0.00, 0.15)           |
| Subm.R.V30                      | -0.10 (-2.10, 1.65)           | 0.02 (-0.01, 0.17)          | 0.03 (-0.07, 0.12)          | 0.03 (-0.05, 0.16)          | 0.03 (-0.04, 0.22)          | 0.03 (-0.05, 0.12)          | 0.02 (-0.12, 0.16)          | 0.03 (0.00, 0.43)           |
| Subm.R.V50                      | -0.14 (-1.14, 1.39)           | 0.10 (-0.00, 0.             |                             |                             |                             |                             |                             |                             |

Table 9 Mean model coefficients for A\*.

|                      | LR                  | Lasso               | Ridge               | ElasticNet          | PCLR                | LAELR               | Dropout             | LRnn                |
|----------------------|---------------------|---------------------|---------------------|---------------------|---------------------|---------------------|---------------------|---------------------|
| $\sum \beta_{<0.01}$ | -0.08 (-0.09,-0.06) | 0.00 (0.00,0.00)    | 0.00 (0.00,0.00)    | 0.00 (0.00,0.00)    | 0.00 (0.00,0.00)    | 0.00 (0.00,0.00)    | 0.00 (0.00,0.00)    | 0.00 (0.00,0.00)    |
| $\sum \beta_{>0.01}$ | 1.78 (1.76,1.79)    | 1.36 (1.31,1.41)    | 1.34 (1.31,1.38)    | 1.36 (1.29,1.40)    | 1.72 (1.69,1.74)    | 1.72 (1.69,1.74)    | 1.26 (1.17,1.37)    | 1.72 (1.70,1.73)    |
| $P_{\beta_{<0.01}}$  | 0.25 (0.25,0.25)    | 0.00 (0.00,0.00)    | 0.00 (0.00,0.00)    | 0.00 (0.00,0.00)    | 0.00 (0.00,0.00)    | 0.00 (0.00,0.00)    | 0.00 (0.00,0.00)    | 0.00 (0.00,0.00)    |
| $P_{\beta_{>0.01}}$  | 0.75 (0.75,0.75)    | 0.92 (0.75,1.00)    | 1.00 (1.00,1.00)    | 1.00 (1.00,1.00)    | 1.00 (1.00,1.00)    | 1.00 (1.00,1.00)    | 1.00 (1.00,1.00)    | 0.94 (0.75,1.00)    |
| Intercept            | -1.51 (-1.53,-1.49) | -1.35 (-1.37,-1.33) | -1.34 (-1.36,-1.33) | -1.34 (-1.37,-1.31) | -1.52 (-1.54,-1.51) | -1.52 (-1.54,-1.44) | -1.34 (-1.38,-1.31) | -1.52 (-1.53,-1.50) |
| AGE                  | -0.02 (-0.02,-0.02) | -0.01 (-0.03,-0.00) | -0.04 (-0.05,-0.04) | -0.02 (-0.04,-0.01) | -0.02 (-0.03,-0.02) | -0.02 (-0.03,-0.02) | -0.05 (-0.08,-0.02) | -0.02 (-0.02,-0.01) |
| Subm.L.Dm            | -0.08 (-0.09,-0.06) | 0.02 (0.01,0.05)    | 0.20 (0.16,0.21)    | 0.12 (0.06,0.17)    | 0.37 (0.25,0.46)    | 0.34 (0.17,0.46)    | 0.25 (0.22,0.29)    | 0.03 (0.00,0.08)    |
| Subm.R.Dm            | 0.88 (0.84,0.86)    | 0.51 (0.48,0.55)    | 0.37 (0.36,0.40)    | 0.42 (0.38,0.47)    | 0.50 (0.43,0.63)    | 0.53 (0.44,0.69)    | 0.38 (0.34,0.44)    | 0.78 (0.75,0.81)    |
| Parotid.L.Dm         | 0.58 (0.57,0.59)    | 0.46 (0.45,0.47)    | 0.37 (0.36,0.40)    | 0.41 (0.38,0.43)    | 0.44 (0.37,0.49)    | 0.44 (0.38,0.52)    | 0.30 (0.27,0.34)    | 0.53 (0.51,0.55)    |
| Parotid.R.Dm         | 0.34 (0.33,0.35)    | 0.38 (0.37,0.39)    | 0.40 (0.39,0.41)    | 0.40 (0.38,0.42)    | 0.41 (0.35,0.46)    | 0.40 (0.33,0.45)    | 0.33 (0.28,0.36)    | 0.37 (0.36,0.38)    |
| XER.BSL.2            | 0.34 (0.33,0.34)    | 0.24 (0.23,0.26)    | 0.26 (0.25,0.27)    | 0.25 (0.23,0.27)    | 0.32 (0.31,0.33)    | 0.32 (0.31,0.33)    | 0.18 (0.15,0.22)    | 0.33 (0.33,0.34)    |
| XER.BSL.3            | 0.34 (0.07,0.85)    | 0.06 (0.04,0.07)    | 0.09 (0.09,0.11)    | 0.08 (0.06,0.09)    | 0.22 (0.08,0.65)    | 0.39 (-0.01,2.38)   | 0.14 (-0.01,0.26)   | 0.32 (0.09,0.75)    |

Table 10 Mean model coefficients for B\*.

|                      | LR                  | Lasso               | Ridge               | ElasticNet          | PCLR                | LAELR               | Dropout             | LRnn                |
|----------------------|---------------------|---------------------|---------------------|---------------------|---------------------|---------------------|---------------------|---------------------|
| $\sum \beta_{<0.01}$ | -3.08 (-3.44,-2.77) | -0.00 (0.00,0.00)   | 0.00 (0.00,0.00)    | 0.00 (0.00,0.00)    | 0.00 (0.00,0.00)    | -0.02 (-0.22,0.00)  | -0.00 (-0.03,0.00)  | 0.00 (0.00,0.00)    |
| $\sum \beta_{>0.01}$ | 5.06 (4.74,5.53)    | 1.37 (1.29,1.47)    | 1.50 (1.47,1.54)    | 1.48 (1.41,1.55)    | 2.10 (2.05,2.16)    | 2.13 (2.03,2.43)    | 1.69 (1.63,1.76)    | 2.23 (2.14,2.65)    |
| $P_{\beta_{<0.01}}$  | 0.47 (0.44,0.50)    | 0.00 (0.00,0.00)    | 0.00 (0.00,0.00)    | 0.00 (0.00,0.00)    | 0.00 (0.00,0.00)    | 0.02 (0.00,0.25)    | 0.00 (0.00,0.00)    | 0.00 (0.00,0.00)    |
| $P_{\beta_{>0.01}}$  | 0.53 (0.50,0.56)    | 0.79 (0.69,0.88)    | 1.00 (1.00,1.00)    | 0.92 (0.88,1.00)    | 1.00 (1.00,1.00)    | 0.97 (0.69,1.00)    | 0.98 (0.94,1.00)    | 0.77 (0.69,0.88)    |
| Intercept            | -1.80 (-1.97,-1.74) | -1.36 (-1.42,-1.33) | -1.39 (-1.41,-1.37) | -1.39 (-1.42,-1.35) | -1.67 (-1.72,-1.65) | -1.69 (-1.75,-1.65) | -1.50 (-1.52,-1.47) | -1.77 (-1.99,-1.72) |
| AGE                  | -0.05 (-0.33,-0.26) | -0.01 (-0.03,-0.00) | -0.03 (-0.03,-0.02) | -0.02 (-0.04,-0.01) | 0.04 (0.03,0.06)    | 0.04 (0.01,0.07)    | 0.00 (0.00,0.06)    | -0.04 (-0.04,-0.03) |
| Subm.L.Dm            | -0.29 (-0.33,-0.26) | 0.01 (0.00,0.03)    | 0.06 (0.05,0.06)    | 0.04 (0.03,0.06)    | 0.16 (0.11,0.16)    | 0.14 (-0.03,0.17)   | 0.07 (0.02,0.11)    | 0.00 (0.00,0.03)    |
| Subm.L.V10           | 0.62 (0.51,0.81)    | 0.02 (0.00,0.08)    | 0.07 (0.07,0.08)    | 0.07 (0.04,0.08)    | 0.14 (0.14,0.19)    | 0.14 (0.14,0.33)    | 0.12 (0.08,0.15)    | 0.10 (0.02,0.28)    |
| Subm.L.V30           | -0.71 (-0.76,-0.65) | 0.00 (-0.00,0.01)   | 0.02 (0.01,0.03)    | 0.02 (0.00,0.02)    | 0.15 (0.11,0.18)    | 0.14 (-0.04,0.18)   | 0.02 (-0.03,0.06)   | 0.00 (0.00,0.00)    |
| Subm.L.V50           | 0.39 (0.37,0.41)    | 0.05 (0.02,0.08)    | 0.07 (0.07,0.08)    | 0.07 (0.05,0.08)    | 0.12 (0.06,0.14)    | 0.13 (0.08,0.20)    | 0.08 (0.04,0.11)    | 0.06 (0.03,0.10)    |
| Subm.R.Dm            | 0.26 (0.23,0.29)    | 0.13 (0.07,0.20)    | 0.12 (0.11,0.12)    | 0.12 (0.10,0.15)    | 0.17 (0.16,0.20)    | 0.18 (0.14,0.27)    | 0.15 (0.11,0.19)    | 0.18 (0.12,0.26)    |
| Subm.R.V10           | 0.01 (-0.14,0.17)   | 0.01 (0.00,0.03)    | 0.09 (0.08,0.10)    | 0.08 (0.05,0.09)    | 0.18 (0.16,0.21)    | 0.17 (0.04,0.20)    | 0.15 (0.11,0.18)    | 0.17 (0.08,0.26)    |
| Subm.R.V30           | 0.57 (0.49,0.72)    | 0.05 (0.02,0.10)    | 0.10 (0.09,0.11)    | 0.10 (0.07,0.12)    | 0.18 (0.16,0.21)    | 0.19 (0.16,0.38)    | 0.16 (0.12,0.20)    | 0.51 (0.40,0.79)    |
| Subm.R.V50           | 0.07 (0.05,0.09)    | 0.16 (0.13,0.19)    | 0.13 (0.12,0.14)    | 0.14 (0.12,0.17)    | 0.16 (0.15,0.19)    | 0.15 (0.12,0.20)    | 0.13 (0.10,0.16)    | 0.14 (0.09,0.18)    |
| Parotid.L.Dm         | 1.76 (1.09,1.40)    | 0.13 (0.08,0.18)    | 0.11 (0.10,0.11)    | 0.11 (0.08,0.15)    | 0.10 (0.09,0.11)    | 0.12 (0.08,0.35)    | 0.11 (0.07,0.14)    | 0.15 (0.07,0.22)    |
| Parotid.L.V10        | -0.32 (-0.38,-0.28) | 0.07 (0.04,0.13)    | 0.12 (0.11,0.12)    | 0.11 (0.09,0.14)    | 0.14 (0.13,0.17)    | 0.13 (0.03,0.16)    | 0.13 (0.10,0.16)    | 0.06 (0.01,0.13)    |
| Parotid.L.V30        | 0.08 (0.03,0.14)    | 0.14 (0.10,0.19)    | 0.11 (0.11,0.12)    | 0.12 (0.10,0.15)    | 0.09 (0.08,0.10)    | 0.09 (0.08,0.11)    | 0.10 (0.06,0.13)    | 0.18 (0.12,0.23)    |
| Parotid.L.V50        | -0.51 (-0.56,-0.46) | 0.01 (0.00,0.02)    | 0.05 (0.04,0.05)    | 0.04 (0.02,0.05)    | 0.04 (0.02,0.06)    | 0.03 (-0.08,0.05)   | 0.04 (0.01,0.07)    | 0.01 (0.00,0.04)    |
| Parotid.R.Dm         | 1.70 (1.58,2.03)    | 0.07 (0.03,0.13)    | 0.13 (0.12,0.13)    | 0.13 (0.10,0.15)    | 0.13 (0.12,0.14)    | 0.15 (0.10,0.46)    | 0.12 (0.08,0.15)    | 0.07 (0.01,0.12)    |
| Parotid.R.V10        | -0.15 (-0.24,-0.08) | 0.39 (0.36,0.42)    | 0.16 (0.15,0.17)    | 0.20 (0.16,0.28)    | 0.15 (0.13,0.20)    | 0.15 (0.08,0.20)    | 0.18 (0.14,0.21)    | 0.47 (0.44,0.50)    |
| Parotid.R.V30        | -0.37 (-0.45,-0.29) | 0.12 (0.07,0.15)    | 0.13 (0.13,0.14)    | 0.13 (0.11,0.15)    | 0.11 (0.11,0.13)    | 0.10 (-0.02,0.14)   | 0.12 (0.09,0.14)    | 0.13 (0.08,0.17)    |
| Parotid.R.V50        | -0.70 (-0.78,-0.62) | 0.00 (-0.00,0.01)   | 0.04 (0.02,0.04)    | 0.02 (0.01,0.04)    | 0.07 (0.02,0.10)    | 0.05 (-0.10,0.10)   | 0.04 (0.01,0.06)    | 0.00 (0.00,0.00)    |
| XER.BSL.2            | 0.36 (0.36,0.36)    | 0.23 (0.21,0.25)    | 0.20 (0.18,0.21)    | 0.21 (0.19,0.24)    | 0.18 (0.13,0.24)    | 0.16 (0.12,0.22)    | 0.16 (0.14,0.20)    | 0.34 (0.34,0.34)    |
| XER.BSL.3            | 0.38 (0.13,0.78)    | 0.05 (0.04,0.07)    | 0.07 (0.06,0.08)    | 0.07 (0.05,0.09)    | 0.04 (-0.20,0.44)   | -0.01 (-0.22,0.27)  | 0.11 (0.03,0.20)    | 0.42 (0.13,0.91)    |

Table 11 Mean model coefficients for C\*.

|                      | LR                  | Lasso               | Ridge               | ElasticNet          | PCLR                | LAELR               | Dropout             | LRnn                |
|----------------------|---------------------|---------------------|---------------------|---------------------|---------------------|---------------------|---------------------|---------------------|
| $\sum \beta_{<0.01}$ | -0.53 (-0.58,-0.48) | 0.00 (0.00,0.00)    | 0.00 (0.00,0.00)    | 0.00 (0.00,0.00)    | -0.00 (-0.03,0.00)  | -0.01 (-0.06,0.00)  | -0.00 (0.00,0.00)   | 0.00 (0.00,0.00)    |
| $\sum \beta_{>0.01}$ | 3.36 (3.32,3.44)    | 2.36 (2.22,2.40)    | 2.26 (2.20,2.32)    | 2.26 (2.17,2.40)    | 2.76 (2.54,2.86)    | 2.76 (2.57,2.96)    | 2.40 (2.25,2.59)    | 2.96 (2.94,3.01)    |
| $P_{\beta_{<0.01}}$  | 0.33 (0.30,0.40)    | 0.00 (0.00,0.00)    | 0.00 (0.00,0.00)    | 0.00 (0.00,0.00)    | 0.01 (0.00,0.10)    | 0.02 (0.00,0.10)    | 0.00 (0.00,0.00)    | 0.00 (0.00,0.00)    |
| $P_{\beta_{>0.01}}$  | 0.55 (0.50,0.70)    | 0.79 (0.60,1.00)    | 1.00 (1.00,1.00)    | 0.97 (0.90,1.00)    | 0.97 (0.90,1.00)    | 0.97 (0.90,1.00)    | 0.99 (0.90,1.00)    | 0.94 (0.80,1.00)    |
| Intercept            | -3.02 (-3.05,-2.99) | -2.69 (-2.75,-2.66) | -2.72 (-2.75,-2.68) | -2.71 (-2.76,-2.64) | -3.02 (-3.10,-2.95) | -3.05 (-3.14,-2.97) | -2.80 (-2.89,-2.73) | -3.04 (-3.08,-3.02) |
| AGE                  | 0.02 (0.01,0.03)    | 0.00 (-0.01,0.02)   | 0.01 (0.00,0.01)    | 0.00 (-0.01,0.02)   | 0.05 (0.04,0.07)    | 0.06 (0.04,0.09)    | 0.01 (-0.02,0.04)   | 0.03 (0.02,0.04)    |
| Subm.L.Dm            | 0.12 (0.08,0.15)    | 0.03 (0.00,0.10)    | 0.17 (0.16,0.19)    | 0.11 (0.05,0.16)    | 0.29 (0.16,0.39)    | 0.31 (0.19,0.41)    | 0.21 (0.16,0.28)    | 0.11 (0.05,0.18)    |
| Subm.R.Dm            | -0.25 (-0.29,-0.22) | 0.01 (-0.00,0.04)   | 0.17 (0.14,0.18)    | 0.08 (0.02,0.14)    | 0.32 (0.19,0.45)    | 0.32 (0.17,0.46)    | 0.20 (0.13,0.27)    | 0.05 (0.00,0.14)    |
| Parotid.L.Dm         | -0.05 (-0.06,-0.03) | 0.04 (0.01,0.06)    | 0.12 (0.10,0.13)    | 0.07 (0.04,0.10)    | 0.21 (0.10,0.30)    | 0.21 (0.10,0.29)    | 0.10 (0.06,0.15)    | 0.02 (0.00,0.05)    |
| Parotid.R.Dm         | 0.22 (0.20,0.23)    | 0.15 (0.13,0.16)    | 0.22 (0.21,0.23)    | 0.19 (0.17,0.21)    | 0.26 (0.18,0.31)    | 0.27 (0.19,0.32)    | 0.20 (0.17,0.23)    | 0.13 (0.11,0.15)    |
| PCM.Sup.Dm           | -0.22 (-0.25,-0.19) | 0.02 (0.00,0.08)    | 0.27 (0.25,0.28)    | 0.12 (0.07,0.24)    | 0.37 (0.27,0.53)    | 0.33 (0.19,0.50)    | 0.27 (0.22,0.33)    | 0.04 (0.00,0.12)    |
| PCM.Med.Dm           | 0.86 (0.82,0.89)    | 0.37 (0.31,0.43)    | 0.27 (0.26,0.29)    | 0.33 (0.24,0.39)    | 0.36 (0.27,0.45)    | 0.40 (0.31,0.52)    | 0.32 (0.25,0.39)    | 0.57 (0.50,0.64)    |
| PCM.Inf.Dm           | 0.57 (-0.01,0.03)   | 0.40 (0.36,0.43)    | 0.25 (0.19,0.22)    | 0.32 (0.15,0.22)    | 0.22 (0.12,0.31)    | 0.22 (0.13,0.38)    | 0.24 (0.17,0.30)    | 0.49 (0.44,0.53)    |
| Supraglottic.Dm      | 0.01 (-0.01,0.03)   | 0.15 (0.11,0.20)    | 0.21 (0.19,0.22)    | 0.18 (0.15,0.22)    | 0.24 (0.19,0.24)    | 0.23 (0.08,0.32)    | 0.20 (0.15,0.25)    | 0.09 (0.04,0.16)    |
| OralCavity.Ext.Dm    | 1.39 (1.58,1.64)    | 1.18 (1.09,1.19)    | 0.56 (0.51,0.62)    | 0.84 (0.65,0.98)    | 0.40 (0.29,0.64)    | 0.45 (0.31,0.70)    | 0.59 (0.46,0.75)    | 1.38 (1.31,1.41)    |
| GlotticArea.Dm       | -0.00 (-0.03,0.03)  | 0.01 (0.00,0.03)    | 0.03 (0.02,0.05)    | 0.02 (0.00,0.04)    | 0.03 (-0.03,0.13)   | 0.02 (-0.06,0.12)   | 0.05 (-0.00,0.09)   | 0.07 (0.01,0.13)    |
| DYSFAGIE.BSL.2       | 0.17 (0.17,0.18)    | 0.16 (0.15,0.17)    | 0.20 (0.20,0.21)    | 0.18 (0.17,0.20)    | 0.22 (0.16,0.24)    | 0.19 (0.11,0.24)    | 0.16 (0.13,0.19)    | 0.19 (0.18,0.19)    |
| DYSFAGIE.BSL.3       | 0.34 (0.34,0.35)    | 0.33 (0.33,0.34)    | 0.36 (0.36,0.37)    | 0.35 (0.34,0.36)    | 0.40 (0.36,0.42)    | 0.38 (0.33,0.42)    | 0.30 (0.27,0.33)    | 0.35 (0.35,0.36)    |

Table 12 Mean model coefficients for  $D_{\Delta}^*$ .

|                       | LR                  | Lasso               | Ridge               | ElasticNet          | PCLR                | LAELR               | Dropout             | LRnn                |
|-----------------------|---------------------|---------------------|---------------------|---------------------|---------------------|---------------------|---------------------|---------------------|
| $\sum_{\rho < -0.01}$ | -9.10 (-9.73,-8.70) | -0.04 (-0.12,0.00)  | -0.15 (-0.18,-0.12) | -0.12 (-0.17,-0.07) | -0.46 (-1.20,-0.08) | -0.30 (-0.93,-0.04) | -0.26 (-0.51,-0.09) | 0.00 (0.00,0.00)    |
| $\sum_{\rho > 0.01}$  | 13.38 (12.86,14.06) | 1.98 (1.81,2.21)    | 2.42 (2.38,2.52)    | 2.23 (2.15,2.45)    | 4.38 (3.07,5.75)    | 3.76 (2.61,5.08)    | 3.23 (2.95,3.62)    | 4.62 (4.05,4.98)    |
| $P_{\rho < -0.01}$    | 0.46 (0.42,0.50)    | 0.03 (0.00,0.07)    | 0.08 (0.07,0.10)    | 0.08 (0.05,0.10)    | 0.20 (0.07,0.30)    | 0.14 (0.03,0.30)    | 0.14 (0.10,0.20)    | 0.00 (0.00,0.00)    |
| $P_{\rho > 0.01}$     | 0.53 (0.50,0.57)    | 0.42 (0.35,0.53)    | 0.87 (0.85,0.88)    | 0.81 (0.65,0.88)    | 0.71 (0.62,0.85)    | 0.80 (0.65,0.95)    | 0.80 (0.70,0.88)    | 0.50 (0.42,0.57)    |
| Intercept             | -3.57 (-3.61,-3.54) | -2.49 (-2.57,-2.42) | -2.61 (-2.63,-2.59) | -2.59 (-2.62,-2.53) | -3.15 (-3.36,-2.93) | -3.04 (-3.32,-2.82) | -2.84 (-2.91,-2.80) | -3.42 (-3.48,-3.38) |
| AGE                   | 0.08 (0.07,0.09)    | 0.00 (-0.01,0.01)   | 0.01 (0.00,0.01)    | 0.01 (-0.00,0.02)   | 0.03 (-0.03,0.06)   | 0.01 (-0.08,0.05)   | 0.01 (-0.03,0.04)   | 0.05 (0.04,0.06)    |
| Subm.L.Dm             | 0.94 (0.49,0.61)    | 0.03 (0.00,0.11)    | 0.08 (0.08,0.09)    | 0.07 (0.05,0.09)    | 0.05 (0.00,0.10)    | 0.07 (0.03,0.14)    | 0.12 (0.07,0.16)    | 0.06 (0.00,0.16)    |
| Subm.L.V10            | -0.16 (-0.28,-0.05) | 0.00 (-0.00,0.01)   | 0.02 (0.02,0.02)    | 0.01 (0.01,0.02)    | 0.01 (-0.10,0.08)   | 0.03 (-0.07,0.12)   | 0.01 (-0.03,0.06)   | 0.10 (0.00,0.23)    |
| Subm.L.V30            | 0.20 (0.07,0.38)    | 0.00 (-0.00,0.01)   | 0.02 (0.01,0.02)    | 0.01 (0.01,0.03)    | -0.04 (-0.10,0.03)  | 0.00 (-0.07,0.07)   | 0.01 (-0.05,0.06)   | 0.04 (0.00,0.30)    |
| Subm.L.V50            | -0.52 (-0.56,-0.48) | 0.01 (-0.00,0.02)   | 0.05 (0.04,0.05)    | 0.03 (0.02,0.05)    | 0.09 (0.02,0.16)    | 0.08 (-0.02,0.15)   | 0.04 (-0.01,0.08)   | 0.00 (0.00,0.03)    |
| Subm.R.Dm             | -0.49 (-0.57,-0.41) | 0.01 (0.00,0.02)    | 0.07 (0.06,0.07)    | 0.05 (0.03,0.07)    | 0.08 (0.04,0.11)    | 0.07 (0.03,0.11)    | 0.09 (0.05,0.15)    | 0.02 (0.00,0.11)    |
| Subm.R.V10            | -0.00 (-0.09,0.09)  | 0.00 (-0.00,0.01)   | 0.02 (0.01,0.02)    | 0.01 (0.00,0.01)    | 0.00 (-0.05,0.05)   | 0.03 (-0.03,0.10)   | 0.01 (-0.04,0.06)   | 0.00 (0.00,0.00)    |
| Subm.R.V30            | -0.21 (-0.32,-0.12) | 0.00 (-0.00,0.01)   | 0.01 (0.00,0.01)    | 0.01 (-0.00,0.01)   | -0.02 (-0.12,0.03)  | 0.01 (-0.08,0.05)   | -0.02 (-0.07,0.03)  | 0.05 (0.00,0.12)    |
| Subm.R.V50            | 0.33 (0.29,0.39)    | 0.01 (0.00,0.05)    | 0.06 (0.05,0.07)    | 0.05 (0.02,0.06)    | 0.12 (0.01,0.21)    | 0.10 (-0.01,0.19)   | 0.07 (0.03,0.11)    | 0.02 (0.00,0.08)    |
| Parotid.L.Dm          | -0.03 (-0.18,0.12)  | 0.01 (0.00,0.02)    | 0.04 (0.03,0.04)    | 0.03 (0.01,0.04)    | 0.01 (-0.02,0.05)   | 0.04 (-0.03,0.09)   | 0.04 (-0.01,0.08)   | 0.00 (0.00,0.01)    |
| Parotid.L.V10         | 0.46 (0.40,0.52)    | 0.04 (0.01,0.08)    | 0.08 (0.07,0.08)    | 0.07 (0.05,0.09)    | 0.01 (-0.07,0.17)   | 0.02 (-0.05,0.11)   | 0.09 (0.05,0.14)    | 0.04 (0.00,0.08)    |
| Parotid.L.V30         | 0.01 (-0.06,0.07)   | 0.01 (0.00,0.03)    | 0.01 (0.00,0.02)    | 0.01 (0.00,0.02)    | -0.01 (-0.09,0.04)  | 0.02 (-0.05,0.09)   | 0.01 (-0.04,0.05)   | 0.00 (0.00,0.03)    |
| Parotid.L.V50         | -0.10 (-0.16,-0.05) | 0.01 (0.00,0.03)    | 0.02 (0.01,0.03)    | 0.02 (0.01,0.03)    | 0.05 (-0.01,0.08)   | 0.06 (-0.01,0.10)   | 0.02 (-0.01,0.05)   | 0.01 (0.00,0.03)    |
| Parotid.R.Dm          | 1.20 (1.02,1.44)    | 0.03 (0.01,0.08)    | 0.06 (0.06,0.07)    | 0.05 (0.03,0.07)    | 0.03 (0.01,0.06)    | 0.07 (0.01,0.13)    | 0.07 (0.03,0.11)    | 0.01 (0.00,0.06)    |
| Parotid.R.V10         | -0.36 (-0.45,-0.28) | 0.01 (0.00,0.02)    | 0.03 (0.03,0.04)    | 0.02 (0.01,0.04)    | -0.03 (-0.11,0.05)  | 0.01 (-0.10,0.09)   | 0.03 (-0.01,0.08)   | 0.00 (0.00,0.04)    |
| Parotid.R.V30         | -0.65 (-0.74,-0.55) | 0.01 (0.00,0.03)    | 0.03 (0.02,0.04)    | 0.02 (0.01,0.04)    | 0.04 (-0.05,0.10)   | 0.06 (-0.01,0.12)   | 0.04 (-0.01,0.08)   | 0.00 (0.00,0.02)    |
| Parotid.R.V50         | -0.11 (-0.20,-0.03) | 0.07 (0.04,0.09)    | 0.08 (0.08,0.09)    | 0.08 (0.06,0.09)    | 0.09 (0.05,0.17)    | 0.10 (0.05,0.14)    | 0.07 (0.04,0.11)    | 0.08 (0.05,0.10)    |
| PCM.Sup.Dm            | 0.61 (0.52,0.71)    | 0.01 (0.00,0.03)    | 0.08 (0.08,0.09)    | 0.06 (0.03,0.09)    | 0.10 (0.04,0.14)    | 0.10 (0.05,0.15)    | 0.10 (0.05,0.14)    | 0.01 (0.00,0.08)    |
| PCM.Sup.V10           | -1.63 (-1.81,-1.45) | 0.00 (-0.00,0.01)   | -0.01 (-0.02,-0.01) | -0.00 (-0.02,0.01)  | -0.03 (-0.17,0.02)  | -0.02 (-0.16,0.05)  | -0.06 (-0.15,0.01)  | 0.00 (0.00,0.00)    |
| PCM.Sup.V30           | -0.43 (-0.50,-0.35) | 0.00 (0.00,0.01)    | 0.03 (0.03,0.04)    | 0.02 (0.01,0.03)    | -0.03 (-0.03,0.12)  | 0.06 (-0.01,0.09)   | 0.03 (-0.04,0.08)   | 0.00 (0.00,0.00)    |
| PCM.Sup.V50           | -0.24 (-0.29,-0.20) | 0.04 (0.01,0.09)    | 0.11 (0.11,0.12)    | 0.10 (0.07,0.14)    | 0.19 (0.11,0.26)    | 0.17 (0.09,0.25)    | 0.11 (0.07,0.14)    | 0.04 (0.00,0.09)    |
| PCM.Med.Dm            | 0.62 (0.52,0.71)    | 0.38 (0.31,0.43)    | 0.13 (0.12,0.14)    | 0.18 (0.12,0.28)    | 0.17 (0.08,0.47)    | 0.15 (0.08,0.33)    | 0.18 (0.12,0.24)    | 0.44 (0.37,0.50)    |
| PCM.Med.V10           | 0.88 (0.73,1.03)    | 0.00 (-0.00,0.01)   | 0.05 (0.04,0.05)    | 0.03 (0.01,0.04)    | 0.21 (0.04,0.60)    | 0.14 (0.01,0.50)    | 0.12 (0.07,0.19)    | 0.89 (0.75,1.04)    |
| PCM.Med.V30           | 1.43 (1.32,1.55)    | 0.01 (0.00,0.02)    | 0.06 (0.06,0.07)    | 0.05 (0.03,0.07)    | 0.11 (-0.01,0.61)   | 0.09 (-0.01,0.35)   | 0.13 (0.07,0.22)    | 0.08 (0.00,0.21)    |
| PCM.Med.V50           | -0.52 (-0.57,-0.48) | 0.01 (0.00,0.02)    | 0.05 (0.03,0.05)    | 0.03 (0.01,0.05)    | 0.09 (-0.14,0.23)   | 0.10 (-0.07,0.24)   | 0.03 (-0.02,0.08)   | 0.00 (0.00,0.00)    |
| PCM.Inf.Dm            | 2.23 (2.28,2.40)    | 0.28 (0.22,0.37)    | 0.14 (0.13,0.16)    | 0.18 (0.13,0.26)    | 0.13 (0.04,0.29)    | 0.15 (0.06,0.36)    | 0.16 (0.09,0.22)    | 0.37 (0.33,0.40)    |
| PCM.Inf.V10           | -0.29 (0.17,0.40)   | 0.00 (-0.00,0.01)   | 0.02 (0.02,0.03)    | 0.01 (0.00,0.02)    | 0.48 (0.11,0.85)    | 0.28 (-0.08,0.78)   | 0.23 (0.15,0.31)    | 0.60 (0.49,0.72)    |
| PCM.Inf.V30           | -0.79 (-0.84,-0.75) | -0.03 (-0.08,-0.00) | -0.05 (-0.06,-0.04) | -0.04 (-0.06,-0.02) | -0.07 (-0.15,0.01)  | -0.05 (-0.19,0.02)  | -0.05 (-0.12,0.00)  | 0.00 (0.00,0.00)    |
| PCM.Inf.V50           | -1.15 (-1.21,-1.09) | 0.01 (0.00,0.03)    | 0.07 (0.06,0.07)    | 0.05 (0.02,0.07)    | 0.15 (0.01,0.23)    | 0.11 (-0.06,0.22)   | 0.06 (0.02,0.10)    | 0.01 (0.00,0.05)    |
| Supraglottic.Dm       | 0.41 (0.33,0.48)    | 0.07 (0.03,0.12)    | 0.12 (0.12,0.13)    | 0.12 (0.09,0.17)    | 0.12 (0.02,0.30)    | 0.12 (0.03,0.29)    | 0.14 (0.10,0.20)    | 0.05 (0.01,0.15)    |
| Supraglottic.V10      | -0.30 (-0.41,-0.21) | 0.00 (-0.00,0.01)   | 0.03 (0.03,0.03)    | 0.01 (0.01,0.02)    | 0.35 (-0.15,0.63)   | 0.25 (-0.04,0.62)   | 0.10 (0.05,0.16)    | 0.00 (0.00,0.00)    |
| Supraglottic.V30      | -0.53 (-0.58,-0.47) | -0.01 (-0.05,0.00)  | -0.04 (-0.05,-0.03) | -0.03 (-0.06,-0.00) | -0.04 (-0.25,0.07)  | -0.01 (-0.14,0.07)  | -0.05 (-0.11,0.01)  | 0.00 (0.00,0.00)    |
| Supraglottic.V50      | 0.24 (0.18,0.28)    | 0.10 (0.06,0.13)    | 0.11 (0.10,0.11)    | 0.10 (0.08,0.12)    | 0.17 (0.08,0.24)    | 0.13 (0.00,0.22)    | 0.11 (0.06,0.15)    | 0.05 (0.01,0.09)    |
| OralCavity.Ext.Dm     | 0.66 (0.55,0.78)    | 0.07 (0.01,0.18)    | 0.18 (0.17,0.19)    | 0.17 (0.12,0.22)    | 0.20 (0.15,0.25)    | 0.16 (0.09,0.27)    | 0.22 (0.17,0.29)    | 0.13 (0.00,0.29)    |
| OralCavity.Ext.V10    | 0.56 (0.45,0.71)    | 0.00 (-0.00,0.01)   | 0.02 (0.02,0.03)    | 0.02 (0.00,0.02)    | 0.00 (-0.09,0.05)   | 0.03 (-0.06,0.08)   | 0.03 (-0.02,0.07)   | 0.01 (0.00,0.07)    |
| OralCavity.Ext.V30    | 0.44 (0.37,0.49)    | 0.17 (0.11,0.24)    | 0.14 (0.13,0.15)    | 0.15 (0.11,0.20)    | 0.20 (0.14,0.34)    | 0.17 (0.08,0.27)    | 0.18 (0.14,0.23)    | 0.38 (0.28,0.46)    |
| OralCavity.Ext.V50    | 0.99 (0.52,0.67)    | 0.58 (0.53,0.61)    | 0.27 (0.26,0.29)    | 0.34 (0.27,0.45)    | 0.31 (0.20,0.46)    | 0.25 (0.11,0.43)    | 0.23 (0.17,0.29)    | 0.64 (0.57,0.71)    |
| GlotticArea.Dm        | -0.83 (-0.90,-0.77) | 0.01 (-0.00,0.01)   | 0.04 (0.04,0.05)    | 0.03 (0.01,0.04)    | 0.03 (-0.01,0.19)   | 0.02 (-0.08,0.18)   | 0.05 (0.01,0.10)    | 0.01 (0.00,0.07)    |
| GlotticArea.V10       | 0.82 (0.67,1.04)    | 0.00 (-0.00,0.01)   | 0.02 (0.02,0.02)    | 0.01 (0.00,0.02)    | 0.48 (0.06,0.88)    | 0.28 (-0.10,0.77)   | 0.20 (0.13,0.27)    | 0.97 (0.86,1.08)    |
| GlotticArea.V30       | 0.18 (0.14,0.22)    | -0.02 (-0.06,-0.00) | -0.05 (-0.07,-0.04) | -0.05 (-0.07,-0.03) | -0.10 (-0.21,-0.03) | -0.09 (-0.18,-0.01) | -0.06 (-0.10,-0.01) | 0.00 (0.00,0.00)    |
| GlotticArea.V50       | 0.54 (0.50,0.58)    | 0.06 (0.02,0.09)    | 0.09 (0.08,0.10)    | 0.08 (0.06,0.11)    | 0.10 (-0.02,0.17)   | 0.09 (-0.01,0.18)   | 0.08 (0.04,0.13)    | 0.22 (0.19,0.25)    |
| DYSFAGIE_BSL2         | 0.16 (0.16,0.17)    | 0.14 (0.12,0.15)    | 0.15 (0.15,0.16)    | 0.15 (0.14,0.16)    | 0.21 (0.16,0.24)    | 0.17 (0.07,0.24)    | 0.11 (0.08,0.15)    | 0.19 (0.18,0.19)    |
| DYSFAGIE_BSL3         | 0.35 (0.34,0.36)    | 0.31 (0.30,0.32)    | 0.30 (0.29,0.31)    | 0.31 (0.29,0.32)    | 0.38 (0.32,0.41)    | 0.29 (0.14,0.41)    | 0.23 (0.19,0.27)    | 0.36 (0.35,0.36)    |
