# Supplementary material for: Performance of binary prediction models in high-correlation low-dimensional settings: a comparison of methods
Source: PubMed Central journal article supplement (PMC8751246; doi:10.1186/s41512-021-00115-5), 2022-01-11

# Additional file 6

## Coefficient estimation results using mean squared error.

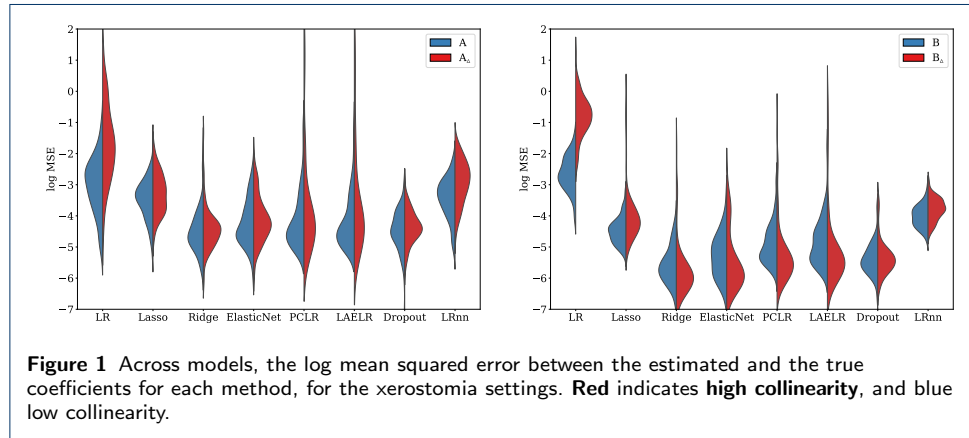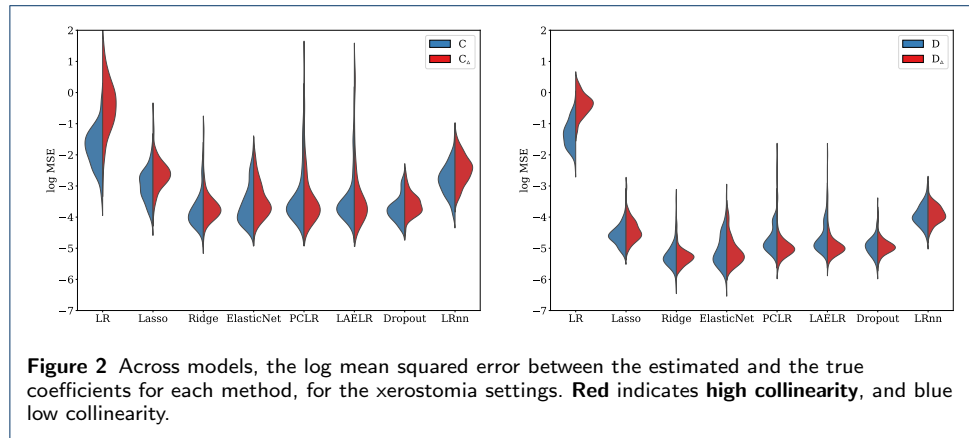

Supplement: 41512_2021_115_MOESM6_ESM.pdf [file 41512_2021_115_MOESM6_ESM.pdf]
